# Supplementary material for: Unleashing non-conjugated polymers as charge relay mediators
Source: Royal Society of Chemistry journal article supplement (doi:10.1039/d1sc04877e), 2021-12-17
Supplement: d1sc04877e1.pdf [file d1sc04877e1.pdf]

## **Supporting Information**

# **Unleashing Non-Conjugated Polymer as Charge Relay Mediator**

## Table of Contents

|                                                                                                                                    | Page NO. |
|------------------------------------------------------------------------------------------------------------------------------------|----------|
| Experimental Section.....                                                                                                          | S4       |
| <b>Figure S1.</b> TEM, size distribution histogram and PL of MQDs .....                                                            | S7       |
| <b>Figure S2.</b> Zeta potentials of ZIS NSs .....                                                                                 | S8       |
| <b>Figure S3.</b> Zeta potentials of ZP .....                                                                                      | S8       |
| <b>Figure S4.</b> Zeta potentials of MQDs .....                                                                                    | S9       |
| <b>Figure S5.</b> UV-vis spectra of MQDs and supernatant after mixing with ZP aqueous solution .....                               | S9       |
| <b>Figure S6.</b> UV-vis absorption spectrum of PDDA aqueous solution .....                                                        | S10      |
| <b>Figure S7.</b> Sample color of ZIS NSs, ZP and ZPM .....                                                                        | S10      |
| <b>Figure S8.</b> Survey spectra of ZIS and ZPM .....                                                                              | S11      |
| <b>Figure S9.</b> High-resolution Ti 2p spectrum of ZPM .....                                                                      | S11      |
| <b>Figure S10.</b> FESEM image of ZIS NSs with elemental mapping and EDS results .....                                             | S12      |
| <b>Figure S11.</b> FESEM image of ZP with elemental mapping and EDS results .....                                                  | S13      |
| <b>Figure S12.</b> FESEM image of ZPM with elemental mapping and EDS results .....                                                 | S14      |
| <b>Figure S13.</b> HRTEM images of ZPM.....                                                                                        | S15      |
| <b>Figure S14.</b> Original and magnified images of Fig. 2(d) .....                                                                | S16      |
| <b>Figure S15.</b> UV-vis absorption spectra of ZPM reduction of 4-NA .....                                                        | S17      |
| <b>Figure S16.</b> Photoactivities toward 4-NA reduction without adding catalyst or light irradiation .....                        | S17      |
| <b>Figure S17.</b> Photoactivities of ZP-x and ZPM-x toward 4-NA reduction .....                                                   | S18      |
| <b>Figure S18.</b> Photoactivities of PDDA and MQDs toward 4-NA reduction.....                                                     | S18      |
| <b>Figure S19.</b> Characterization of ZM .....                                                                                    | S19      |
| <b>Figure S20.</b> A.Q.Y. of ZPM under different monochromatic wavelengths .....                                                   | S20      |
| <b>Figure S21.</b> Photoactivities of ZPM with and without adding Na <sub>2</sub> SO <sub>3</sub> toward 4-NA photoreduction ..... | S20      |
| <b>Figure S22.</b> Characterization of ZPM after cyclic photoreactions .....                                                       | S21      |
| <b>Figure S23.</b> Molecular structures of different polyelectrolytes or molecules .....                                           | S22      |
| <b>Figure S24.</b> Zeta potentials of ZIS/BPEI, ZIS/PAH, ZIS/AET and ZIS/APTES.....                                                | S23      |
| <b>Figure S25.</b> Characterization of ZIS/BPEI/MQDs.....                                                                          | S24      |
| <b>Figure S26.</b> Characterization of ZIS/PAH/MQDs .....                                                                          | S25      |

|                                                                                                                  |     |
|------------------------------------------------------------------------------------------------------------------|-----|
| <b>Figure S27.</b> Characterization of ZIS/AET/MQDs .....                                                        | S26 |
| <b>Figure S28.</b> Characterization of ZIS/APTES/MQDs .....                                                      | S27 |
| <b>Figure S29.</b> Zeta potentials of CdS/PDDA, CIS/PDDA and IS/PDDA .....                                       | S28 |
| <b>Figure S30.</b> Characterization of CdS/PDDA/MQDs .....                                                       | S29 |
| <b>Figure S31.</b> Characterization of CIS/PDDA/MQDs .....                                                       | S30 |
| <b>Figure S32.</b> Characterization of IS/PDDA/MQDs .....                                                        | S31 |
| <b>Figure S33.</b> Mott-Schottky plots of ZIS probed under different frequencies.....                            | S32 |
| <b>Figure S34.</b> Mott-Schottky plots of ZP probed under different frequencies.....                             | S32 |
| <b>Figure S35.</b> Mott-Schottky plots of ZPM probed under different frequencies.....                            | S33 |
| <b>Table S1.</b> Functional groups vs. wavenumber for different samples.....                                     | S34 |
| <b>Table S2.</b> Specific surface area, pore volume and pore size of ZIS NSs, ZP, and ZPM .....                  | S34 |
| <b>Table S3.</b> Chemical bond species vs. B.E. for different samples.....                                       | S35 |
| <b>Table S4.</b> Photoactivities of different samples toward reduction of a series of nitroaromatic compounds... | S36 |
| <b>Table S5.</b> Photoactivities of different samples toward 4-NA photoreduction.....                            | S37 |
| <b>Table S6.</b> Fitted EIS results of different samples based on the equivalent circuit.....                    | S37 |

## Experimental Section

### 1. Materials

Zinc acetate dehydrate [ $\text{Zn}(\text{CH}_3\text{COO})_2 \cdot 2\text{H}_2\text{O}$ ], cadmium acetate dihydrate [ $\text{Cd}(\text{CH}_3\text{COO})_2 \cdot 2\text{H}_2\text{O}$ ], thioacetamide (TAA), Anhydrous Sodium Sulfite ( $\text{Na}_2\text{SO}_3$ ), Hydrofluoric acid (HF), ammonium hydroxide ( $\text{NH}_3 \cdot \text{H}_2\text{O}$ ), silver nitrate ( $\text{AgNO}_3$ ), Methanol ( $\text{CH}_3\text{OH}$ ), Ethanol ( $\text{C}_2\text{H}_6\text{O}$ ), Ethylene glycol ( $\text{C}_2\text{H}_6\text{O}_2$ ), Glycerol ( $\text{C}_3\text{H}_8\text{O}_3$ ), Lactic acid ( $\text{C}_3\text{H}_6\text{O}_3$ ), cadmium chloride hemi(pentahydrate) ( $\text{CdCl}_2 \cdot 2.5\text{H}_2\text{O}$ ), S powder, 2-aminoethanethiol (AET) and 3-aminopropyltrimethoxysilane ( $\text{C}_9\text{H}_{23}\text{NO}_3\text{Si}$ , APTES) were obtained from Sinopharm Chemical Reagent Co., Ltd. (Shanghai, China). Sodium sulfide ( $\text{Na}_2\text{S} \cdot 9\text{H}_2\text{O}$ ), Indium chloride ( $\text{InCl}_3$ ), 4-Nitroaniline (4-NA), 2-nitroaniline(2-NA), 4-nitrophenol, 2-nitrophenol, 1-Bromo-4-Nitrobenzene, 1-chloro-4-nitrobenzene, 4-nitrotoluene and 4-nitroanisole were obtained from Aladdin Industrial Corporation (Shanghai, China). Branched Polyethylenimine (BPEI), Poly(dimethyldiallylammonium) chloride (PDDA) and Poly(allylamine hydrochloride) (PAH) were obtained from Sigma-Aldrich (China) Co., Ltd. Deionized water (DI  $\text{H}_2\text{O}$ , Millipore,  $18.2 \text{ M}\Omega \cdot \text{cm}$  resistivity).  $\text{Ti}_3\text{AlC}_2$  was purchased from Laizhou Kai Kai Ceramic Materials Co., Ltd. All the materials are analytical grade and used as received without further purification.

### 2. Preparation of $\text{ZnIn}_2\text{S}_4$ nanosheets<sup>S1</sup>

Single-unit-cell  $\text{ZnIn}_2\text{S}_4$  layers were fabricated by a facile low-temperature refluxing method. In detail, 1.5 mmol of  $\text{Zn}(\text{CH}_3\text{COO})_2 \cdot 2\text{H}_2\text{O}$  and 3 mmol of  $\text{InCl}_3$  were added into 250 mL DI water and stirred for 30 min. Subsequently, an excess amount of thioacetamide (TAA, 8 mmol) was added into the above solution and stirred for another 30 min. The solution was then heated to  $95^\circ\text{C}$  and maintained at that temperature for 5 h under vigorous stirring. After cooling to room temperature, the  $\text{ZnIn}_2\text{S}_4$  (ZIS) precipitate was collected by centrifugation and washed with DI  $\text{H}_2\text{O}$  three times.

### 3. Preparation of CdS nanosheets<sup>S2</sup>

CdS nanosheets were prepared via a hydrothermal method reported previously. In detail, 0.32 mmol  $\text{CdCl}_2 \cdot 2.5\text{H}_2\text{O}$ , 2.0 mmol S powder and 12 mL of diethylenetriamine (DETA) were mixed and

vigorously stirred to form a homogeneous suspension. Then, the mixture was transfer into a Teflon-lined stainless-steel autoclave with a capacity of 50 mL for 48 h at 80 °C. After cooling to room temperature, a yellowish precipitate was rinsed with deionized water and ethanol separately and dried in an oven at 60 °C for 24 h to obtain the CdS nanosheets.

#### **4. Preparation of CdIn<sub>2</sub>S<sub>4</sub> nanosheets<sup>S1</sup>**

CdIn<sub>2</sub>S<sub>4</sub> nanosheets were fabricated by a facile low-temperature refluxing method. In detail, 1.5 mmol of Cd(CH<sub>3</sub>COO)<sub>2</sub>·2H<sub>2</sub>O and 3 mmol of InCl<sub>3</sub> were added into 250 mL DI water and stirred for 30 min. Subsequently, an excess amount of thioacetamide (TAA, 8 mmol) was added into the above solution and stirred for another 30 min. The solution was then heated to 100 °C and maintained at that temperature for 12 h under vigorous stirring. After cooling to room temperature, the CdIn<sub>2</sub>S<sub>4</sub> precipitate was collected by centrifugation and washed with DI H<sub>2</sub>O three times.

#### **5. Preparation of In<sub>2</sub>S<sub>3</sub> nanosheets<sup>S3</sup>**

In<sub>2</sub>S<sub>3</sub> nanosheets were fabricated by a facile low-temperature refluxing method. In detail, 8 mmol of TAA and 3 mmol of InCl<sub>3</sub> were added into 250 mL DI water and stirred for 30 min. The solution was then heated to 95 °C and maintained at that temperature for 5 h under vigorous stirring. After cooling to room temperature, the In<sub>2</sub>S<sub>3</sub> precipitate was collected by centrifugation and washed with DI H<sub>2</sub>O three times.

#### **6. Preparation of Ti<sub>3</sub>C<sub>2</sub> QDs (MXene QDs)<sup>S4</sup>**

Ti<sub>3</sub>AlC<sub>2</sub> (2.0 g) powder was immersed in 40 mL 48% HF and stirred for 20 h at 60 °C. The obtained powder was then rinsed multiple times with deionized water. The powder pellet was retrieved by centrifugation at 3500 rpm for 10 min, and the supernatant was discarded. The final product (Ti<sub>3</sub>C<sub>2</sub> powder) was dried at 60 °C under vacuum for 12 h. In an N<sub>2</sub>-protected environment, the Ti<sub>3</sub>C<sub>2</sub> powder was then placed in 80 mL deionized water followed ultrasound for 1h. The pH of mixer was adjusted around 9 by ammonia and the mixer was transferred into 75 mL Teflon-lined stainless steel autoclave at 120 °C and for 6 h. The MQDs could be obtained by filtering the mixture by 220 nm membrane.

## **7. Preparation of ZnIn<sub>2</sub>S<sub>4</sub>/MQDs (ZM) nanocomposites**

ZIS NSs (100 mg) were added into 10 mL of MQDs aqueous solution (25 ppm, pH = 9), stirred for 1 hour, ZM was collected by centrifugation, and dried in vacuum at 333K for 12 h.

## **8. Preparation of ZIS/polymers binary nanocomposites**

ZIS NSs (100 mg) were added into 10 mL of polymers solution (10 mg/mL), and vigorously stirred for 1 hour. After that, the mixture was centrifuged, and the thus-obtained polymers-modified ZIS were thoroughly washed with deionized (DI) H<sub>2</sub>O to remove residual free polymers adsorbed on the surface. Finally, the obtained powder was dried in vacuum at 333K for 12 hours. (polymers: poly(dimethyldiallylammonium) chloride (PDDA), branched polyethylenimine (BPEI), poly(allylamine hydrochloride) (PAH), 2-aminoethanethiol (AET) and 3-aminopropyltrimethoxysilane (APTES).)

## **9. Preparation of ZIS/polymers/MQDs ternary nanocomposites**

ZIS/polymers/MQDs nanocomposites were fabricated via an electrostatic self-assembly method under ambient conditions. In detail, ZIS/polymers (100 mg) were added into 10 mL of MQDs aqueous solution (25 ppm, pH = 9), stirred for 1 hour, washed with DI H<sub>2</sub>O, and dried in vacuum at 333K for 12 hours, resulting in the ZIS/polymers/MQDs ternary nanocomposites

## **10. Fabrication of the working electrodes in PEC measurement**

The working electrode was prepared on fluorine-doped tin oxide (FTO) glass that was cleaned by sonication in ethanol for 30 min and dried at 313 K. The boundary of FTO glass was protected using Scotch tape. Next, 5 mg of the sample was dispersed in 0.5 mL of ethanol by sonication to get a slurry, which was spread onto the pretreated FTO glass. After air-drying, remove the Scotch tape. The exposed area of the working electrode was 1 cm<sup>2</sup>. Finally, the working electrode was vertically dipped into the electrolyte and irradiated with visible light ( $\lambda > 420$  nm) (PLS-SXE300D, Beijing Perfect Light Co. Ltd, China).

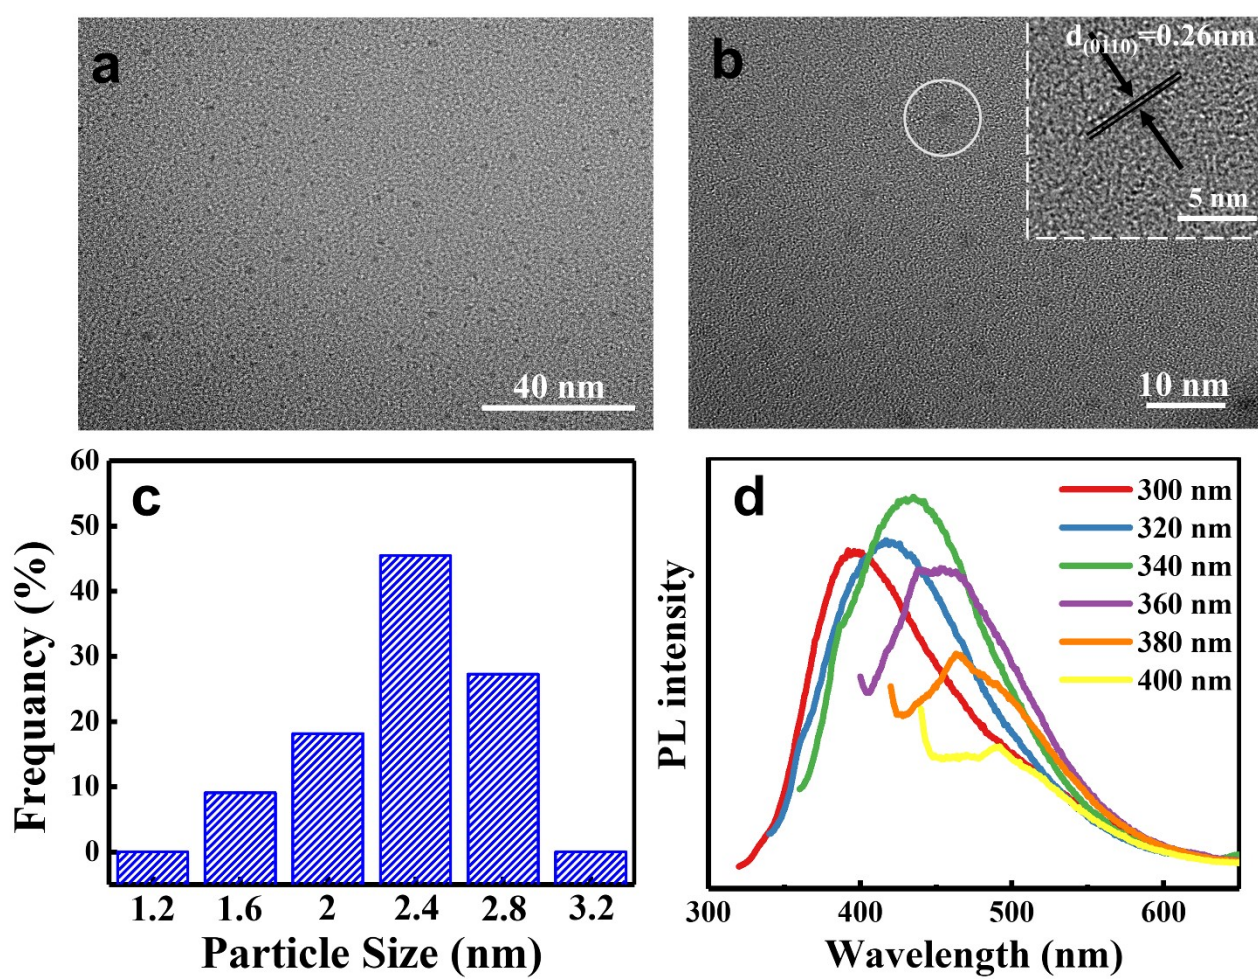

**Fig. S1.** (a) Low-magnified and (b) HRTEM images of MQDs. (c) Size distribution histogram of MQDs obtained from TEM image. (d) PL spectra of MQDs under different excitation wavelengths.

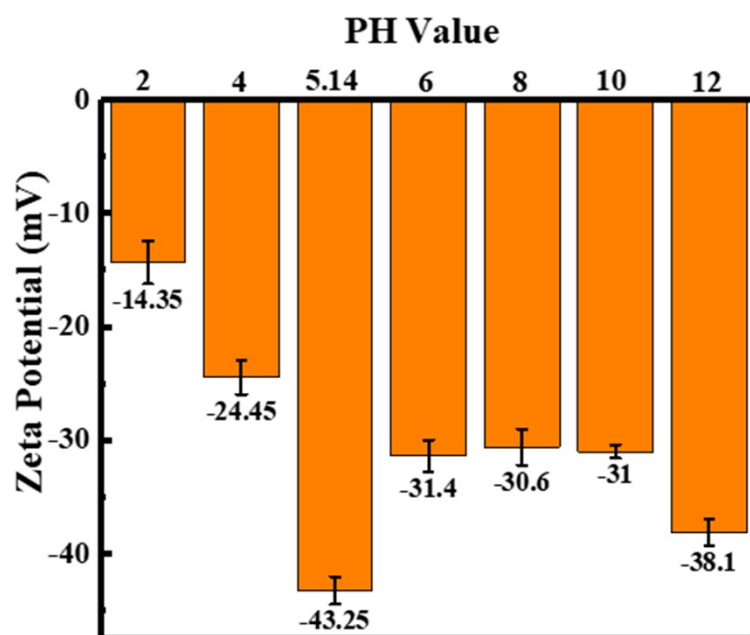

Fig. S2. Zeta potentials of ZIS NSs.

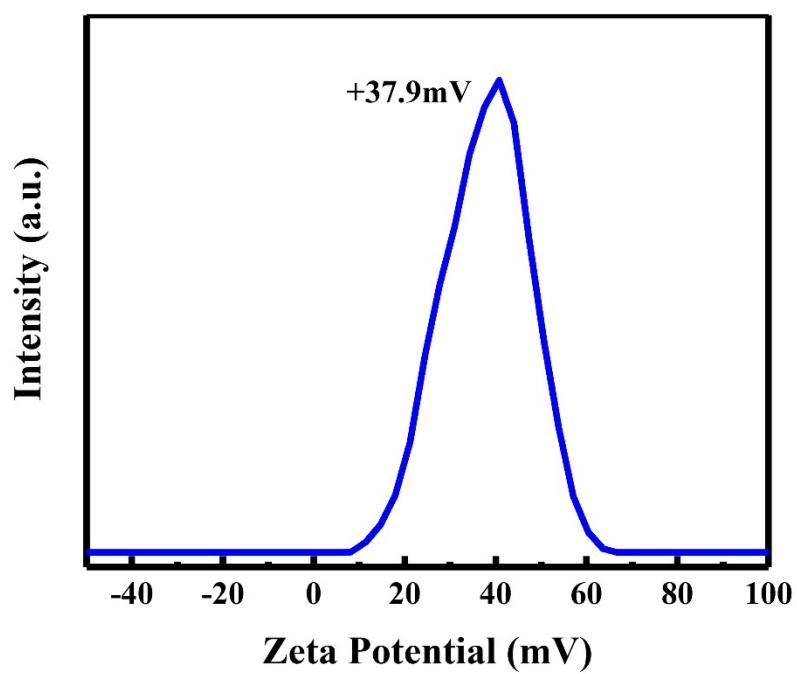

Fig. S3. Zeta potentials of ZP.

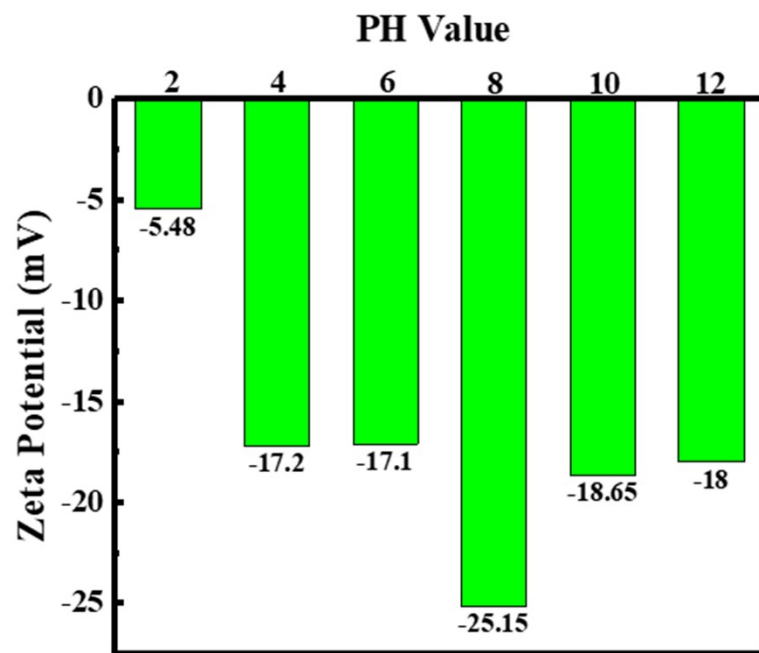

**Fig. S4.** Zeta potentials ( $\xi$ ) of MQDs.

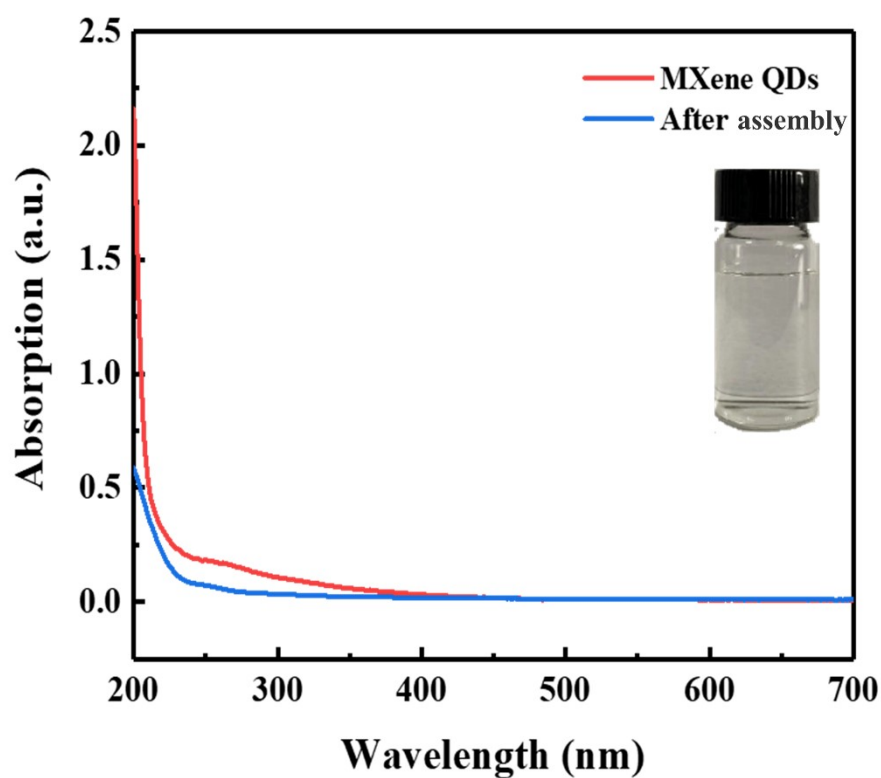

**Fig. S5.** UV-vis absorption spectra of pristine MQDs and supernatant after mixing with ZP. The inset shows the graph of colloidal MQDs aqueous solution.

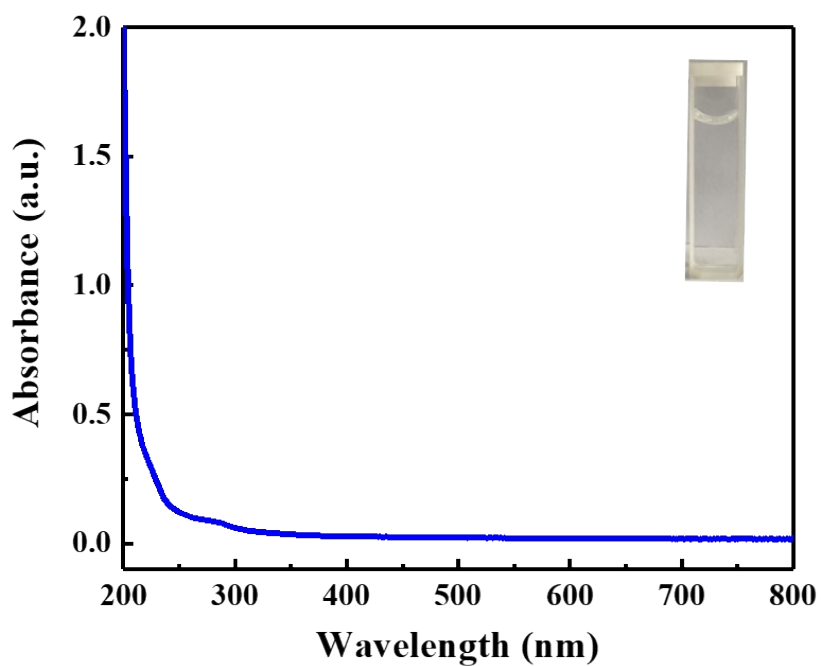

**Fig. S6.** UV-vis absorption spectrum of PDDA aqueous solution.

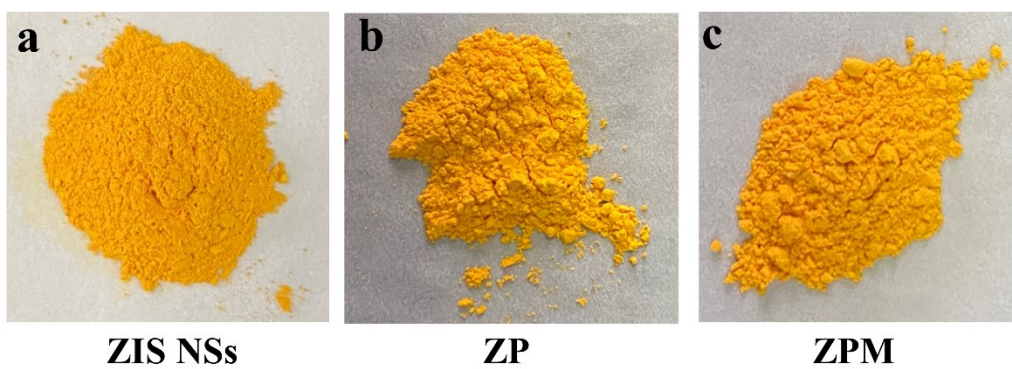

**Fig. S7.** Sample colors of (a) ZIS NSs, (b) ZP and (c) ZPM.

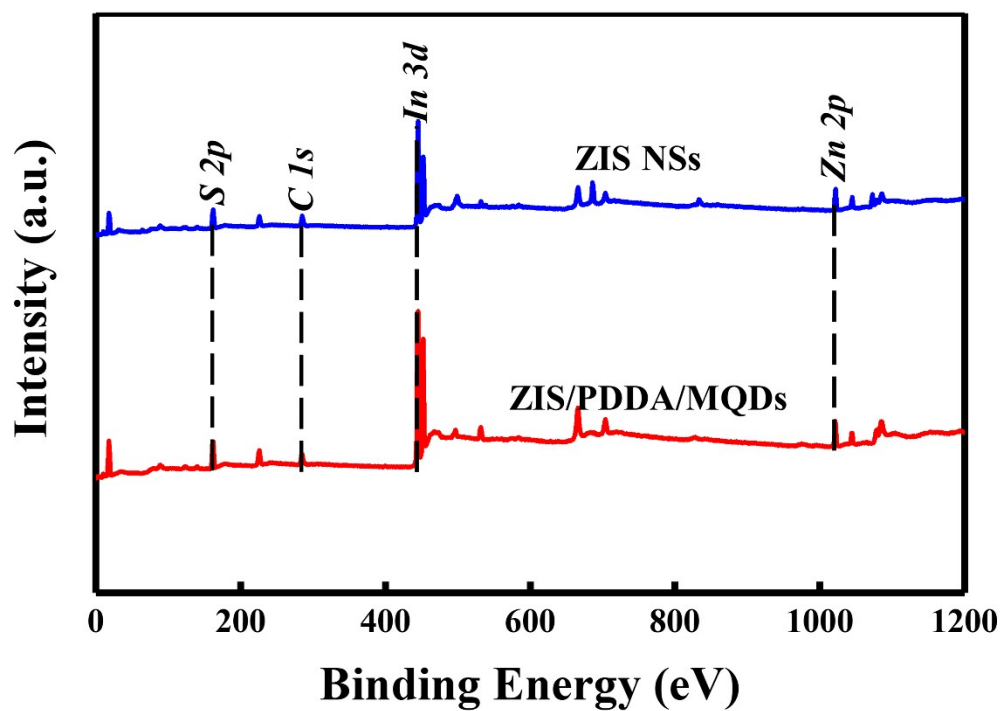

Fig. S8. Survey spectra of ZIS and ZPM.

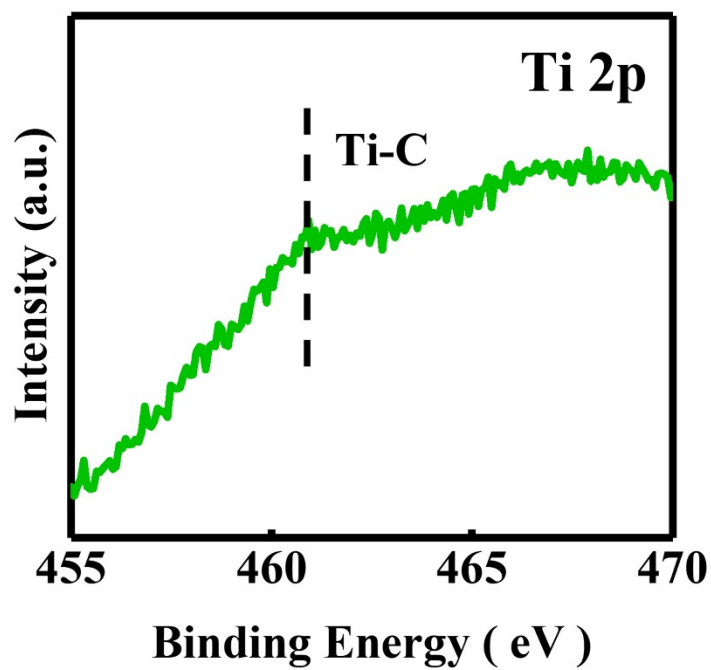

Fig. S9. High-resolution Ti 2p spectrum of ZPM.

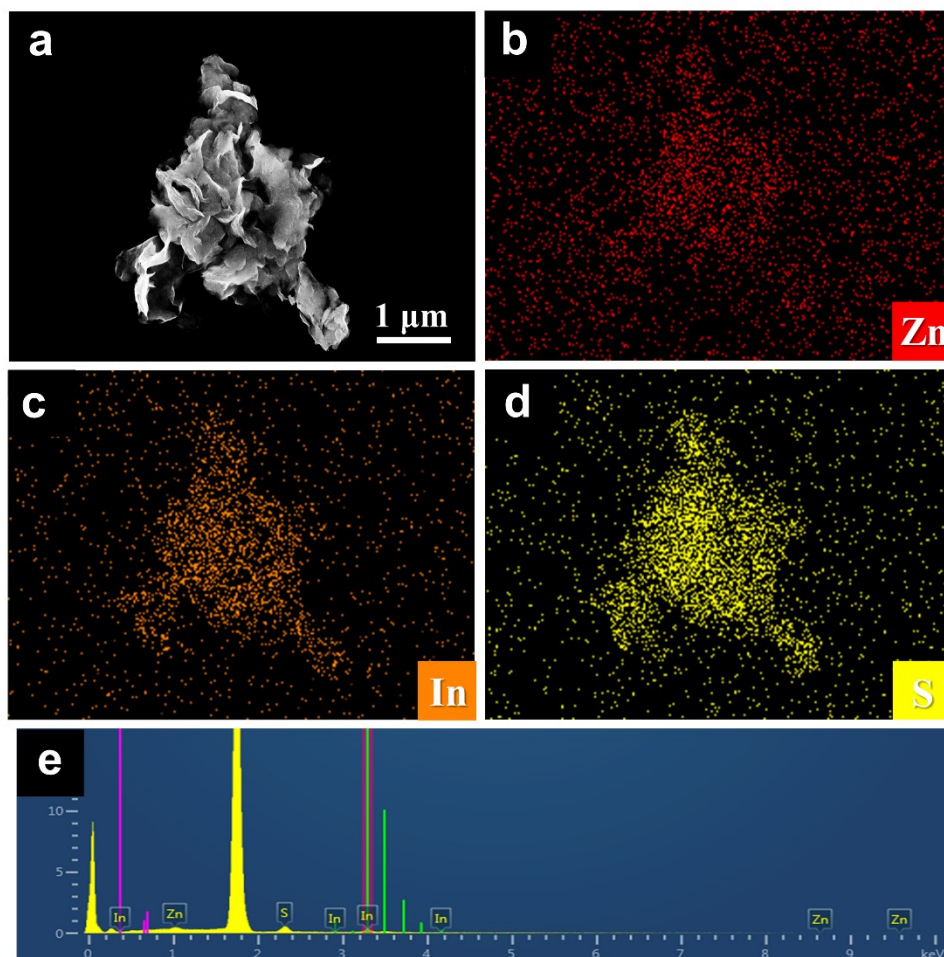

**Fig. S10.** FESEM image (a) and low-magnified FESEM image of ZIS NSs with (b-d) elemental mapping and (e) EDS results.

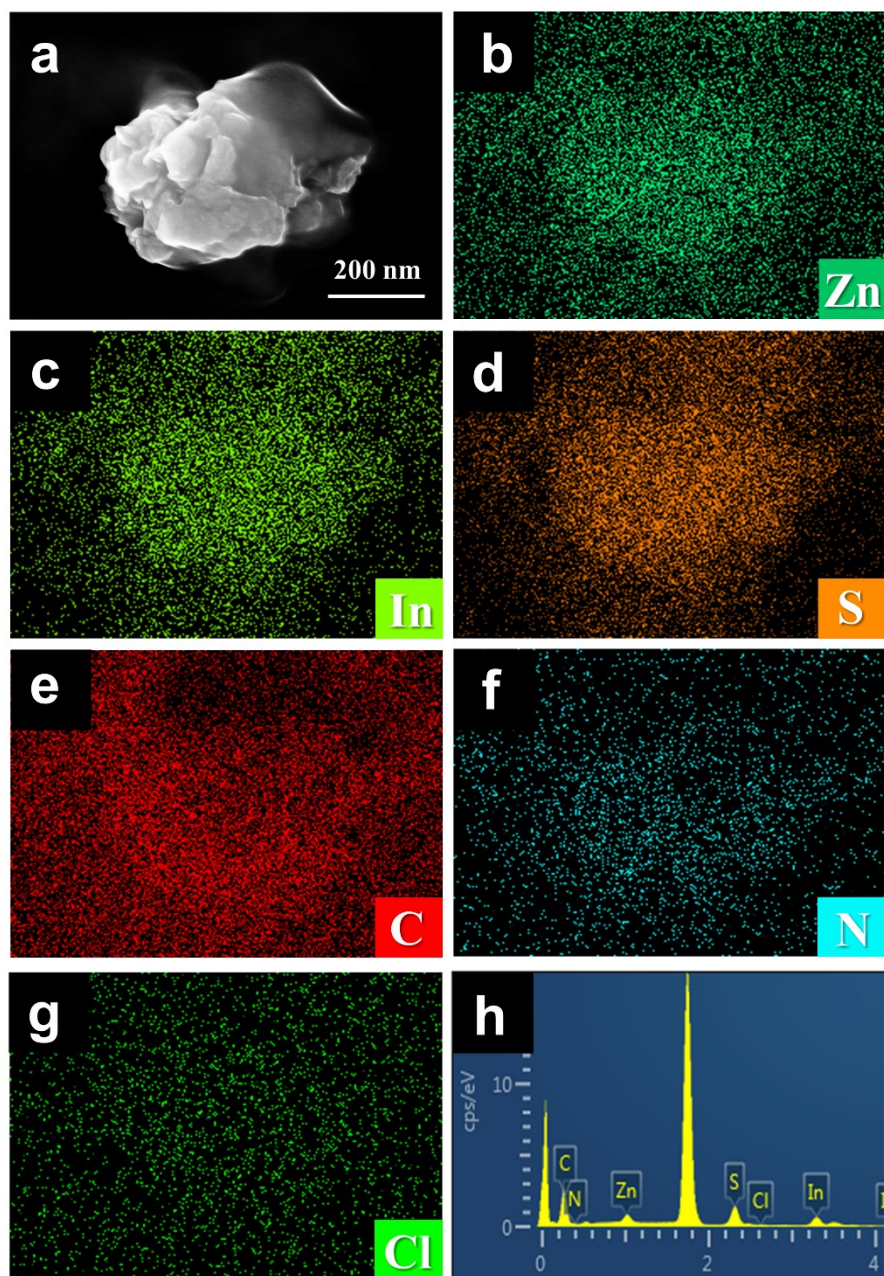

**Fig. S11.** FESEM image (a) and low-magnified FESEM image of ZP with (b-g) elemental mapping and (h) EDS results.

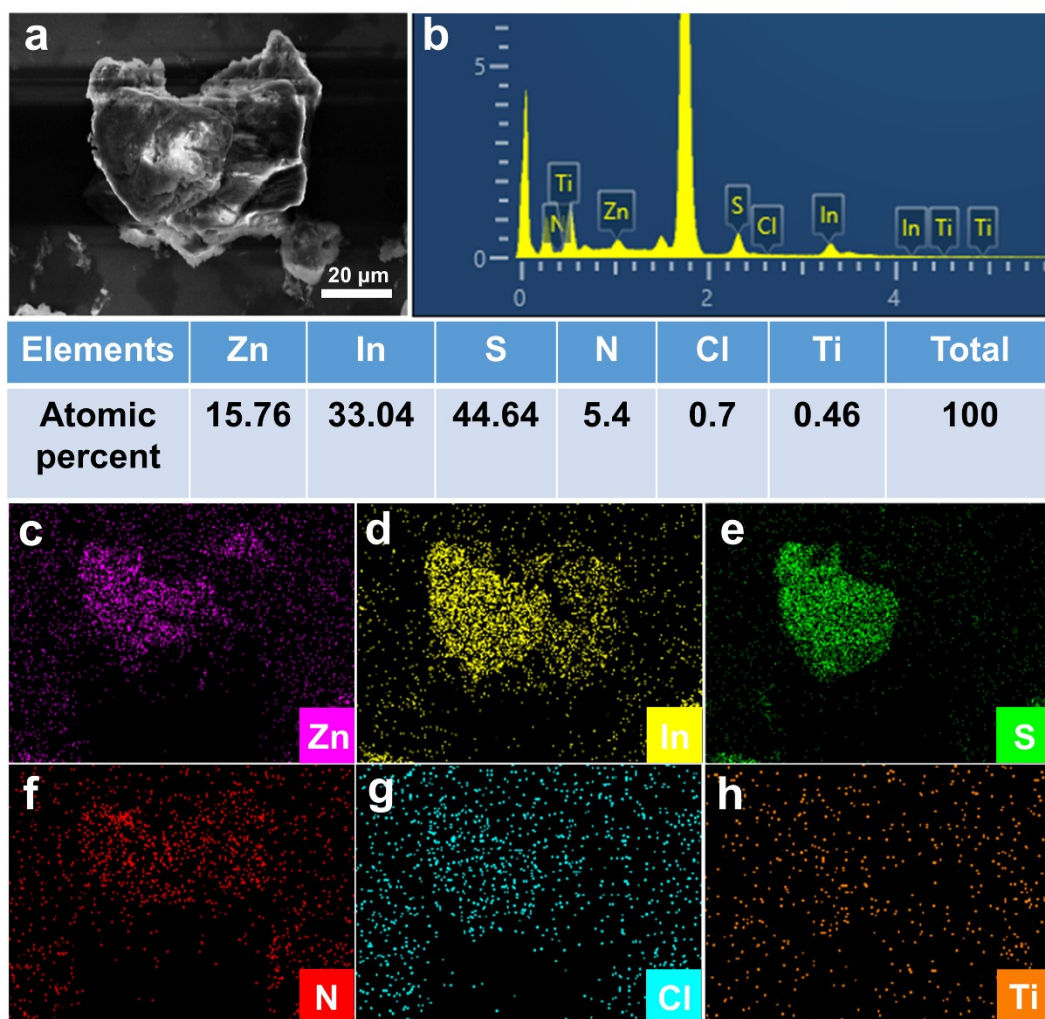

**Fig. S12.** (a) FESEM image of ZPM with (c-h) elemental mapping and (b) EDS results.

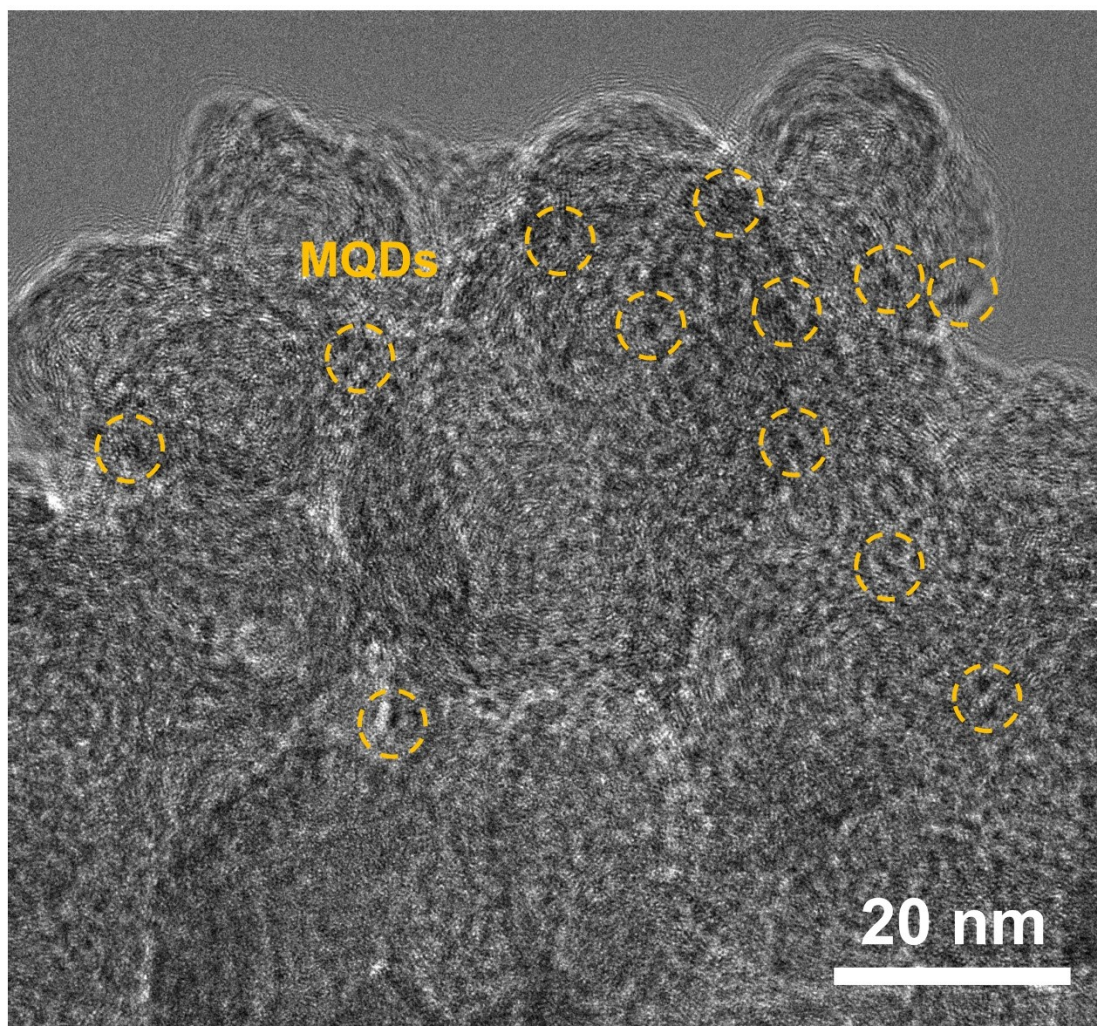

**Fig. S13.** HRTEM image of ZPM.

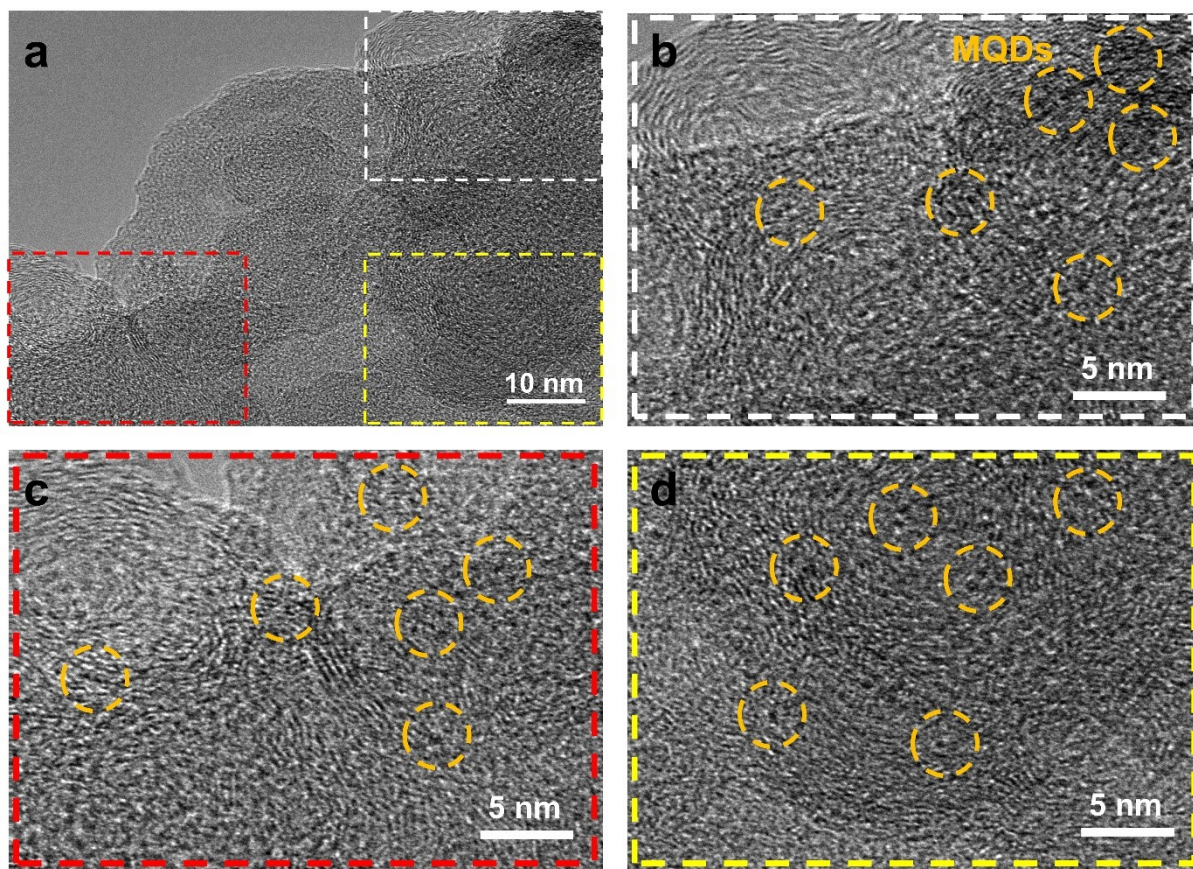

**Fig. S14.** Magnified TEM images of ZPM.

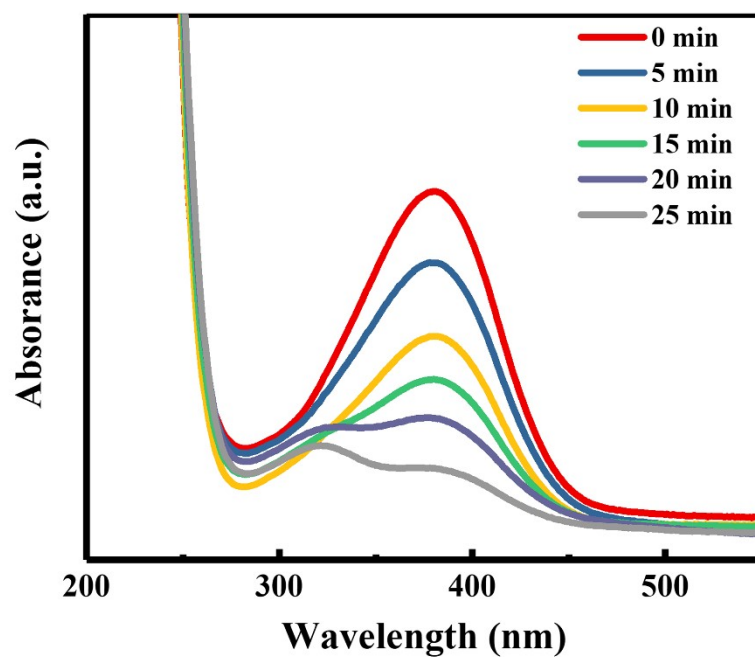

**Fig. S15.** UV-vis absorption spectra of 4-NA collected after designated irradiation time (25 min) when it was reduced over ZPM under visible light irradiation ( $\lambda > 420$  nm) with the addition of  $\text{Na}_2\text{SO}_3$  as hole quencher and  $\text{N}_2$  purge under ambient conditions.

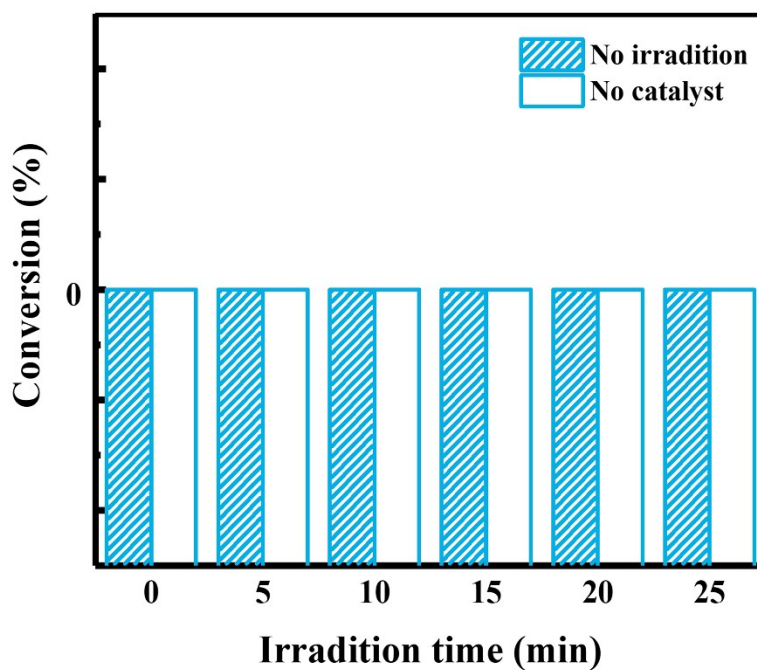

**Fig. S16.** Photoactivities of ZPM toward 4-NA photoreduction without adding catalyst or light irradiation.

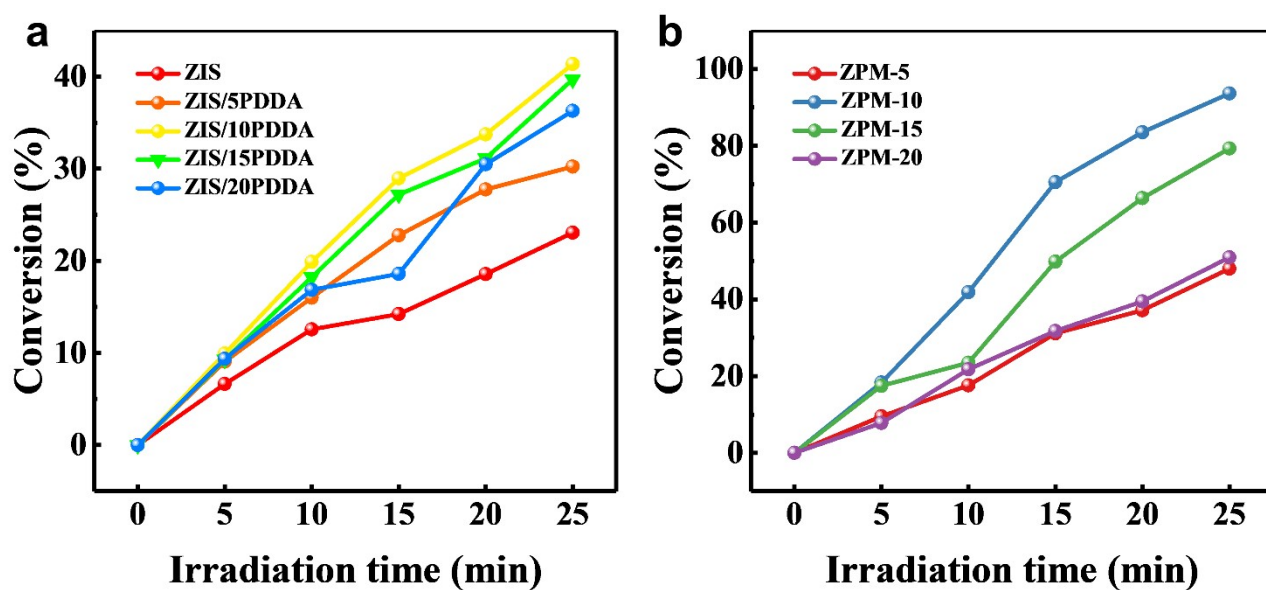

**Fig. S17.** (a) Photoactivities of ZP with different PDDA concentration (5, 10, 15, 20 mg/mL) toward anaerobic reduction of 4-NA to 4-PDA under visible light irradiation ( $\lambda > 420$  nm) and (b) photoactivities of ZPM with different adding volume of MQDs colloidal solution (5, 10, 15, 20 mL) under the same conditions.

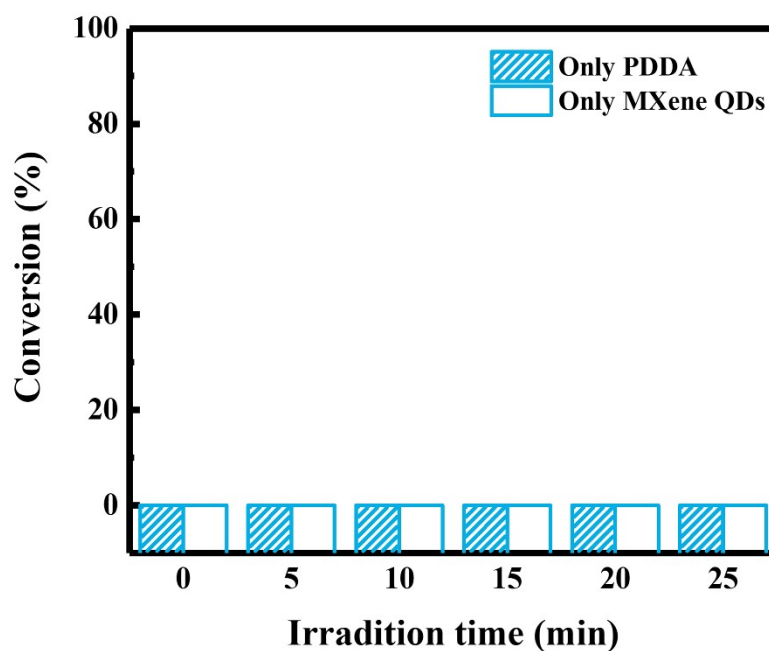

**Fig. S18.** Photoactivities of PDDA and MQDs toward 4-NA reduction.

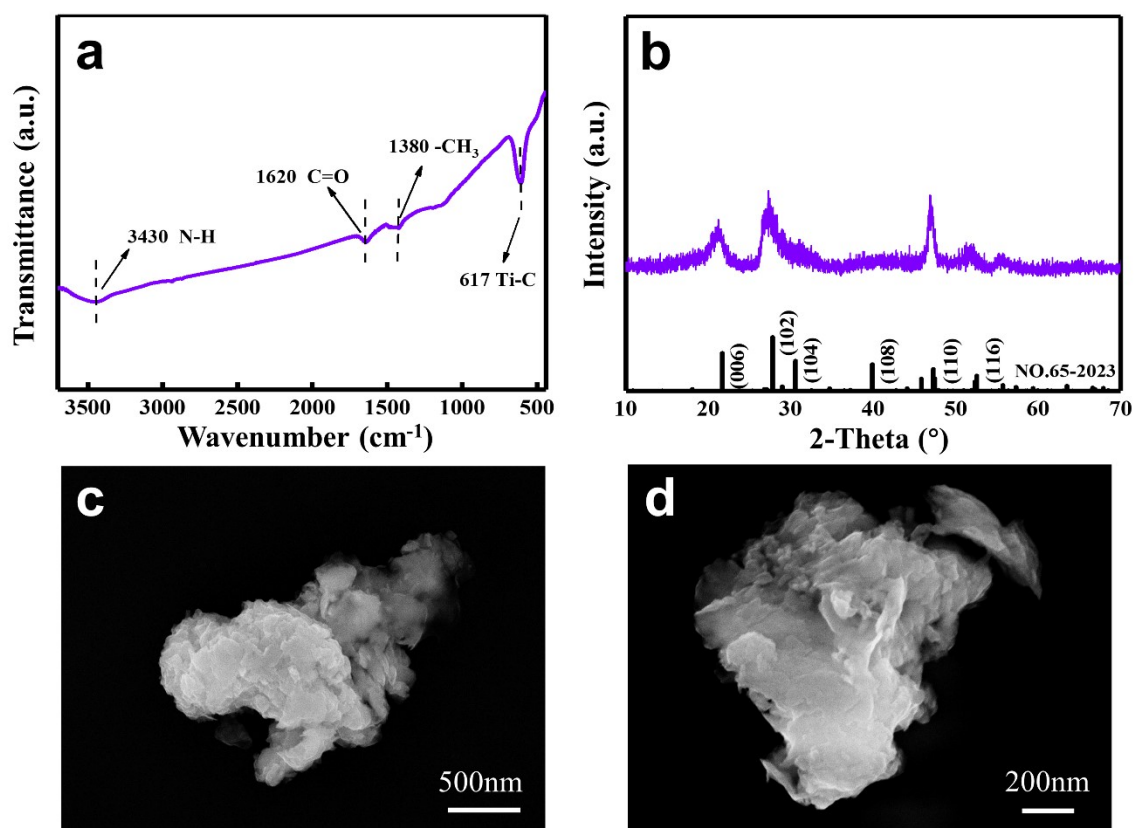

**Fig. S19.** (a) FTIR spectra, (b) XRD pattern, (c) and (d) FESEM image of ZM.

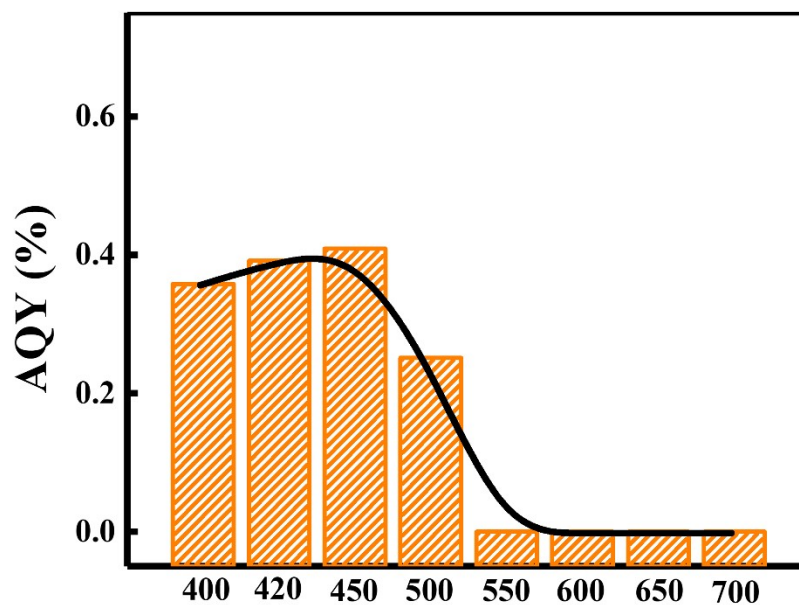

Fig. S20. A.Q.Y. of ZPM under monochromatic light irradiation.

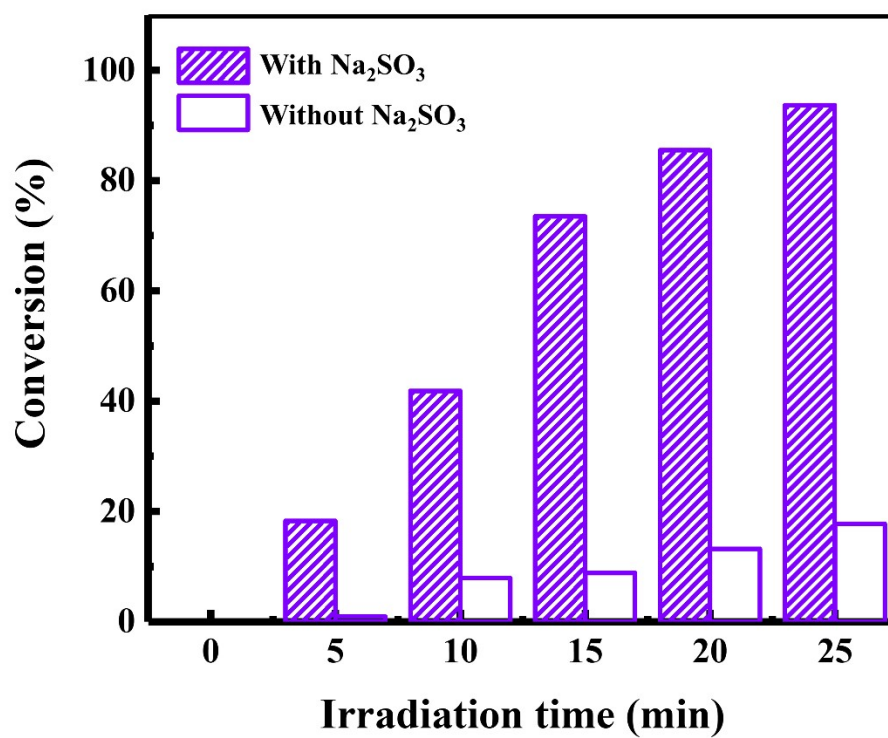

Fig. S21. Photoactivities of ZPM with and without adding  $\text{Na}_2\text{SO}_3$  toward 4-NA photoreduction.

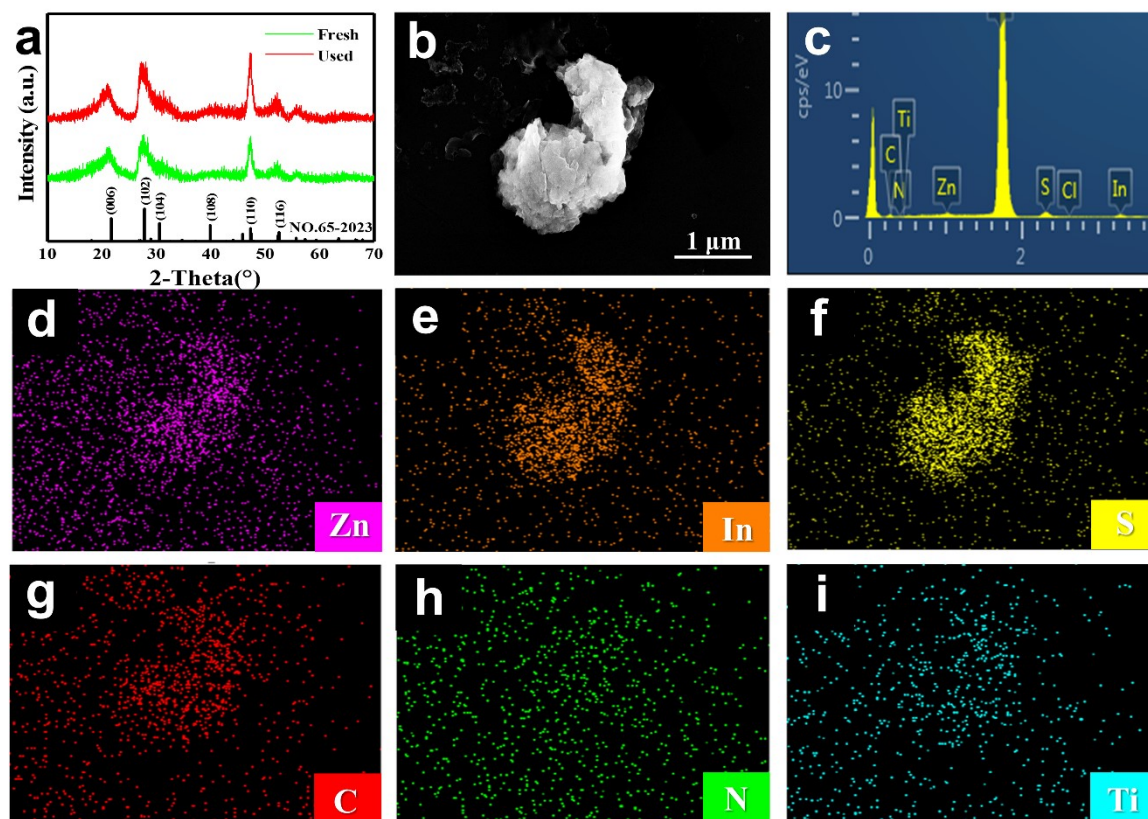

**Fig. S22.** (a) XRD pattern, (b) FESEM image and (c) EDS result of ZPM after cyclic reactions with (d-i) elemental mapping results.

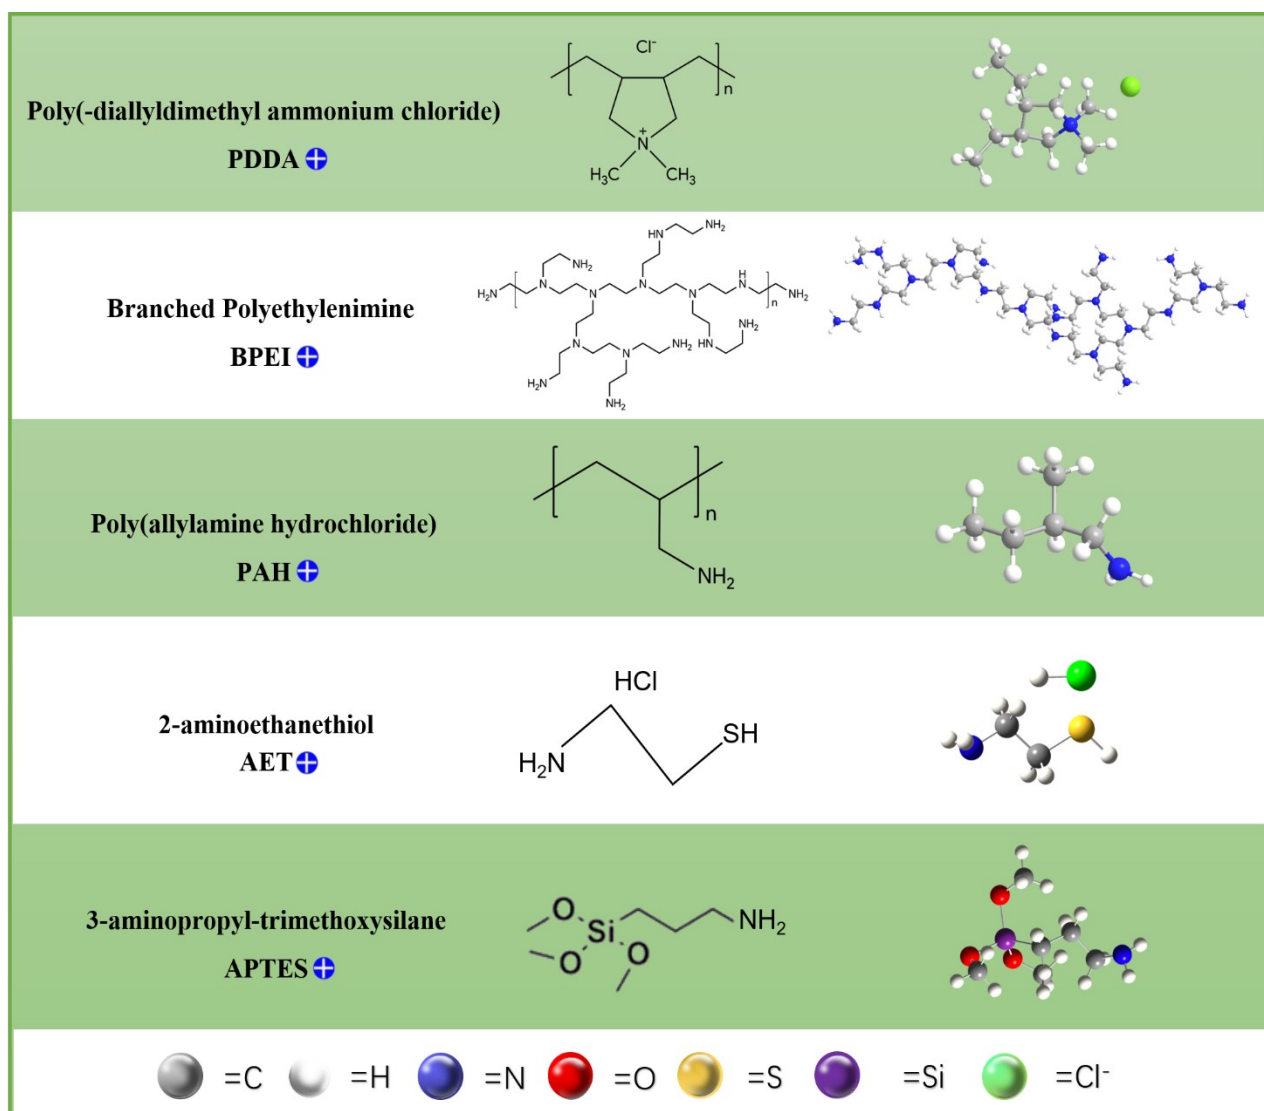

**Fig. S23.** Molecular structures of different polyelectrolytes or molecules.

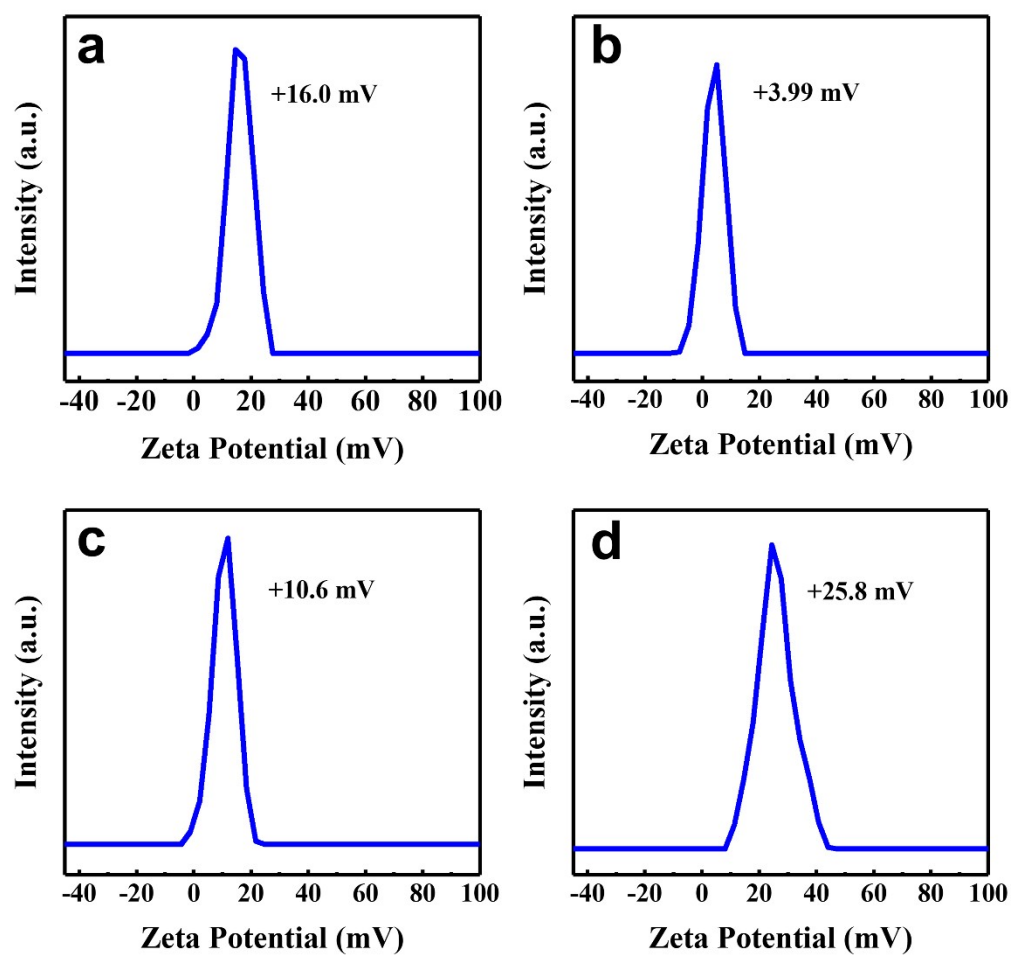

**Fig. S24.** Zeta potentials ( $\xi$ ) of (a) ZIS/BPEI, (b) ZIS/PAH, (c) ZIS/AET and (d) ZIS/APTES.

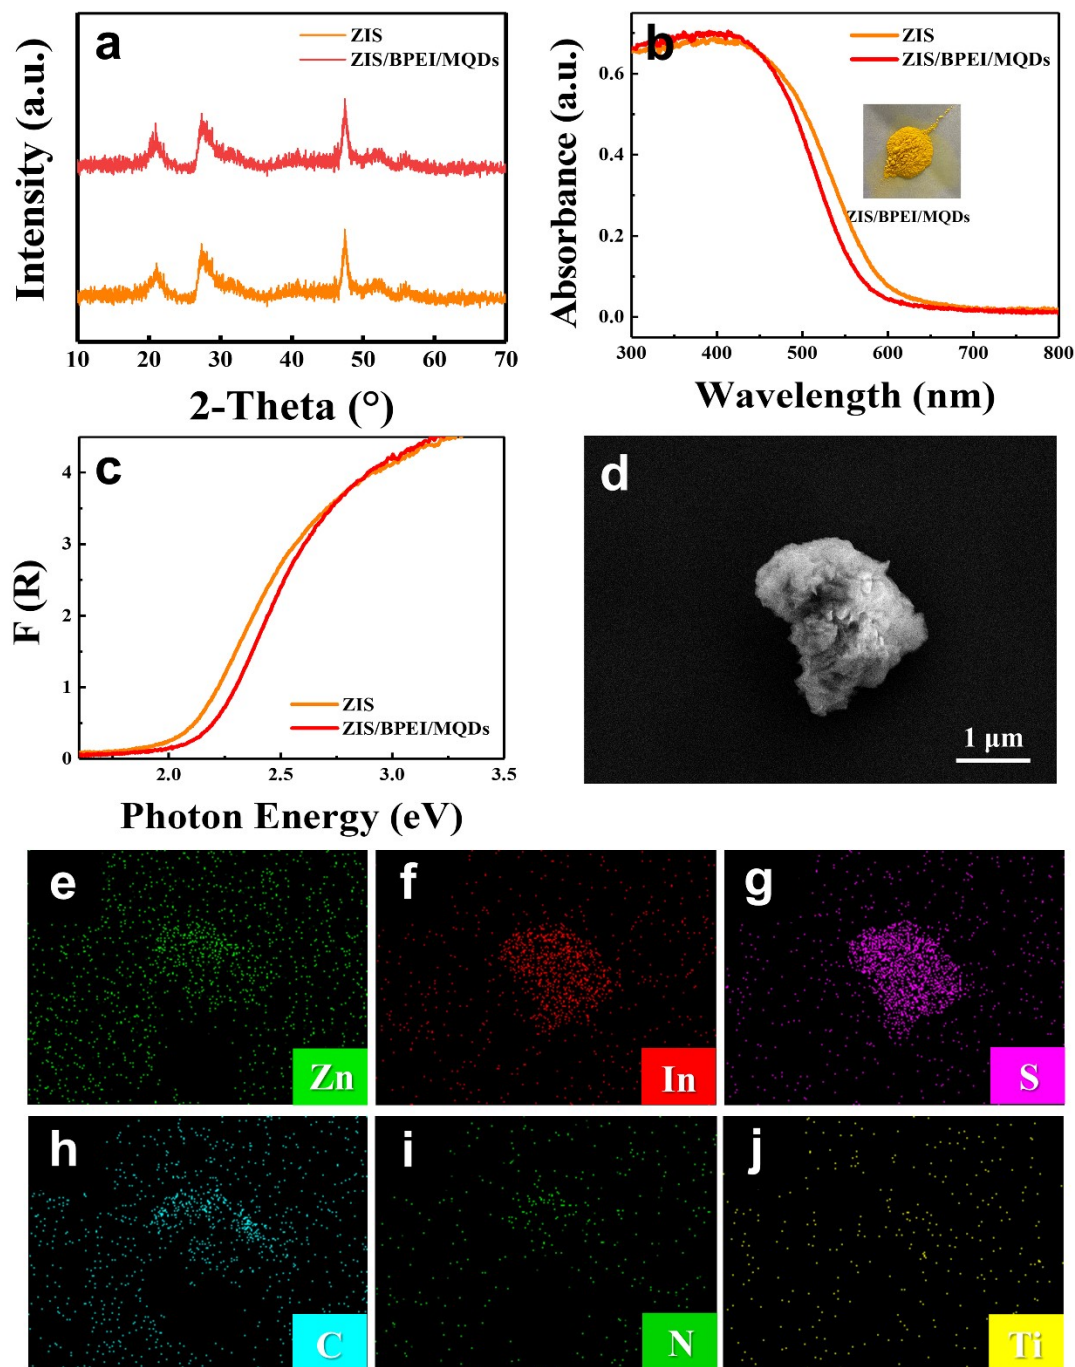

**Fig. S25.** (a) XRD patterns of blank ZIS and ZIS/BPEI/MQDs; (b) DRS spectra of ZIS and ZIS/BPEI/MQDs with (c) transformed plots calculated based on the Kubelka–Munk function vs. the energy of light; (d) FESEM image and (e-j) elemental mapping result of ZIS/BPEI/MQDs.

**Note:** XRD pattern of ZIS/BPEI/MQDs (**Fig. S25a**) shows the hexagonal phase  $\text{ZnIn}_2\text{S}_4$  (JCPDS No. 65-2733)<sup>S1</sup>, similar to that of pure  $\text{ZnIn}_2\text{S}_4$ . As displayed in **Fig. S25(b & c)**,  $\text{ZnIn}_2\text{S}_4$  and ZIS/BPEI/MQDs exhibit the similar absorption edge, indicating both BPEI and MQDs deposition does not influence the optical property of  $\text{ZnIn}_2\text{S}_4$  NSs. Elemental mapping result of ZIS/BPEI/MQDs in **Fig. S25(e-j)** demonstrates the uniform distribution patterns of Zn, In, S, C, N and Ti signals.

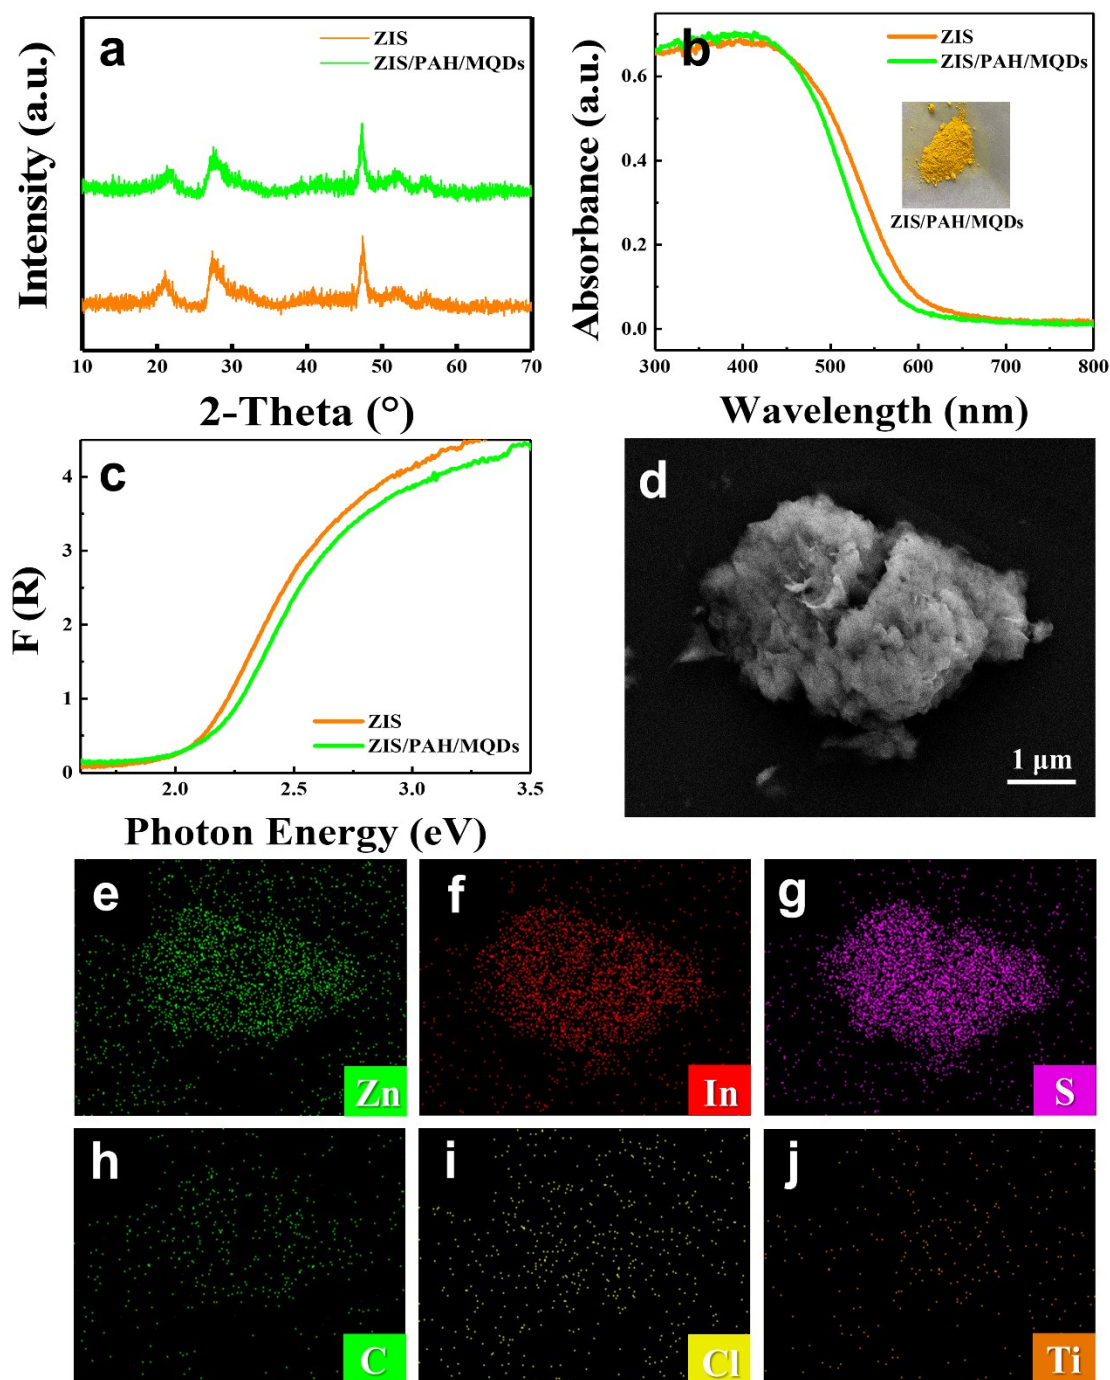

**Fig. S26.** (a) XRD patterns of blank ZIS and ZIS/PAH/MQDs; (b) DRS spectra of ZIS and ZIS/PAH/MQDs with (c) transformed plots calculated based on the Kubelka–Munk function vs. the energy of light; (d) FESEM image and (e-j) elemental mapping result of ZIS/PAH/MQDs.

**Note:** XRD pattern of ZIS/PAH/MQDs (**Fig. S26a**) shows the hexagonal phase  $\text{ZnIn}_2\text{S}_4$  (JCPDS No. 65-223) <sup>S1</sup>, similar to that of pure  $\text{ZnIn}_2\text{S}_4$ . As displayed in **Fig. S26(b & c)**,  $\text{ZnIn}_2\text{S}_4$  and ZIS/PAH/MQDs exhibit the similar absorption edge, indicating both PAH and MQDs deposition does not influence the optical property of  $\text{ZnIn}_2\text{S}_4$  NSs. Elemental mapping result of ZIS/PAH/MQDs in **Fig. S26(e-j)** demonstrates the uniform distribution patterns of Zn, In, S, C, Cl and Ti signals.

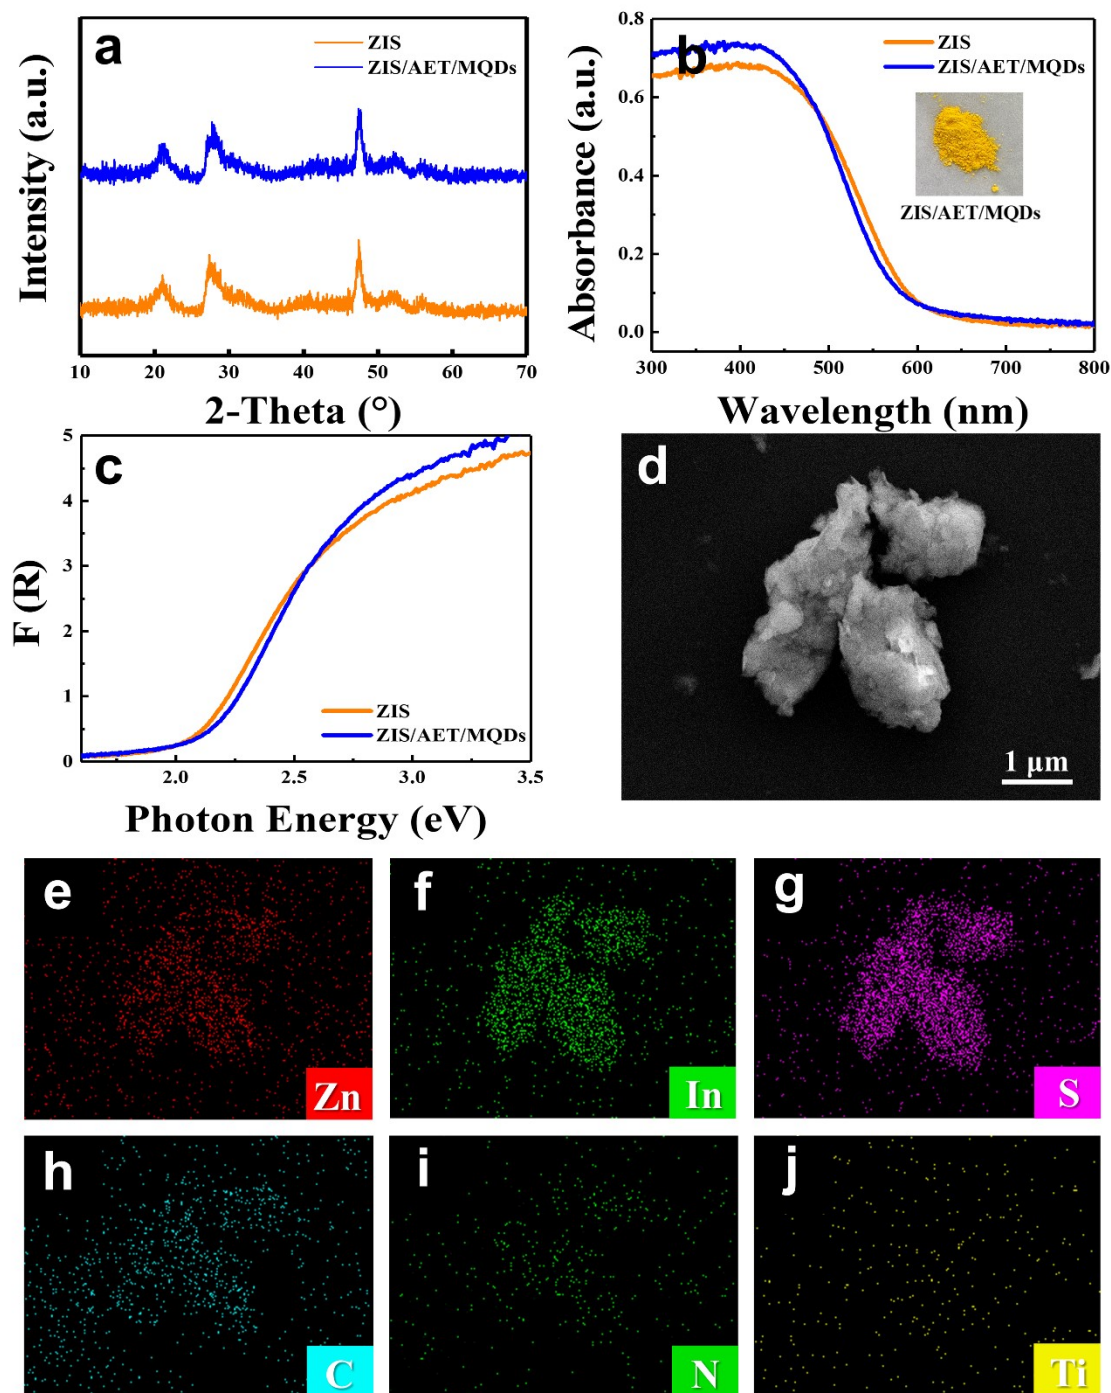

**Fig. S27.** (a) XRD patterns of blank ZIS and ZIS/AET/MQDs; (b) DRS spectra of ZIS and ZIS/AET/MQDs with (c) transformed plots calculated based on the Kubelka–Munk function vs. the energy of light; (d) FESEM image and (e-j) elemental mapping result of ZIS/AET/MQDs.

**Note:** XRD pattern of ZIS/AET/MQDs (**Fig. S27a**) shows the hexagonal phase  $\text{ZnIn}_2\text{S}_4$  (JCPDS No. 65-2233) <sup>S1</sup>, similar to that of pure  $\text{ZnIn}_2\text{S}_4$ . As displayed in **Fig. S27(b & c)**,  $\text{ZnIn}_2\text{S}_4$  and ZIS/AET/MQDs exhibit the similar absorption edge, indicating both AET and MQDs deposition does not influence the optical property of  $\text{ZnIn}_2\text{S}_4$  NSs. Elemental mapping result of ZIS/AET/MQDs in **Fig. S27(e-j)** demonstrates the uniform distribution patterns of Zn, In, S, C, N and Ti signals.

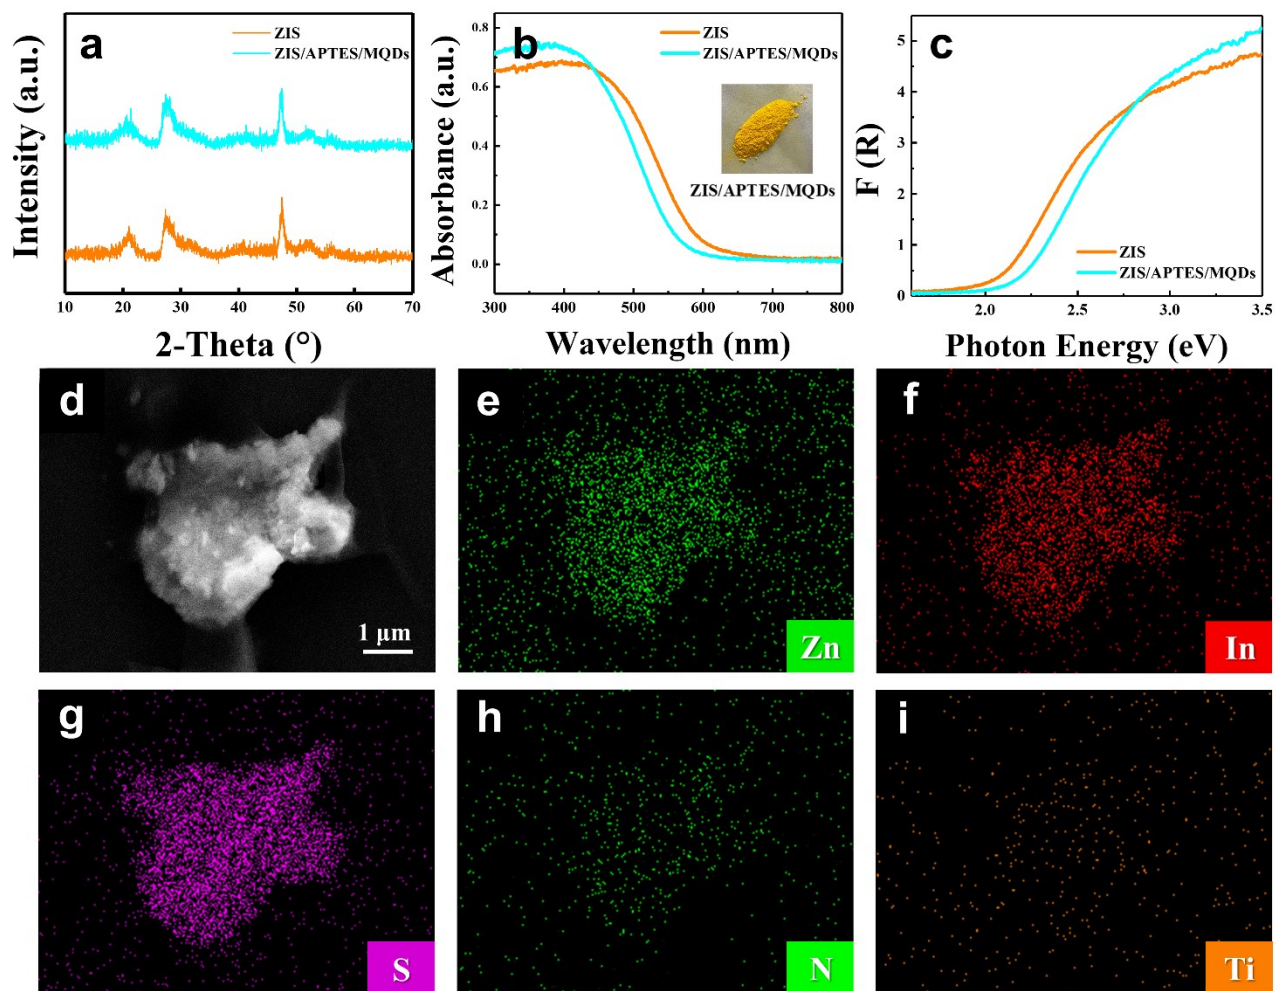

**Fig. S28.** (a) XRD patterns of blank ZIS and ZIS/APTES/MQDs; (b) DRS spectra of ZIS and ZIS/APTES/MQDs with (c) transformed plots calculated based on the Kubelka–Munk function vs. the energy of light; (d) FESEM image and (e-i) elemental mapping result of ZIS/APTES/MQDs.

**Note:** XRD pattern of ZIS/APTES/MQDs (**Fig. S28a**) shows the hexagonal phase  $\text{ZnIn}_2\text{S}_4$  (JCPDS No. 65-2023),<sup>S1</sup> similar to that of pure  $\text{ZnIn}_2\text{S}_4$ . As displayed in **Fig. S28(b & c)**,  $\text{ZnIn}_2\text{S}_4$  and ZIS/APTES/MQDs exhibit the similar absorption edge, indicating both APTES and MQDs deposition does not influence the optical property of  $\text{ZnIn}_2\text{S}_4$  NSs. Elemental mapping result of ZIS/APTES/MQDs in **Fig. S28(e-i)** demonstrates the uniform distribution patterns of Zn, In, S, N and Ti signals.

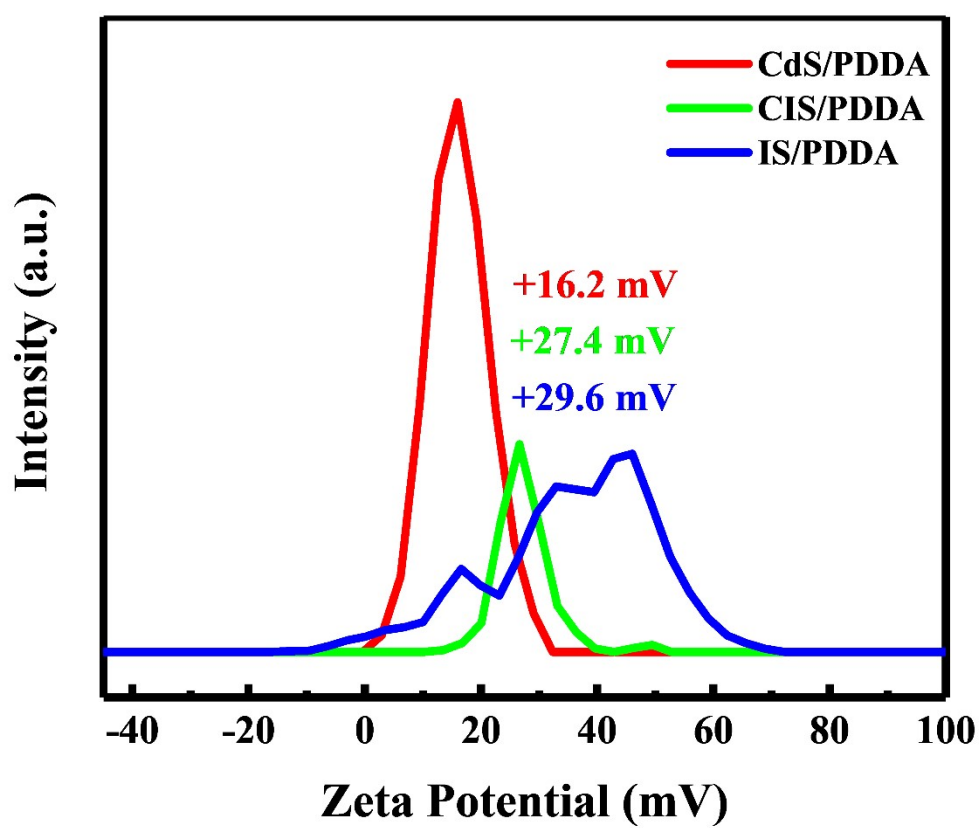

**Fig. S29.** Zeta potentials of CdS/PDDA, CIS/PDDA and IS/PDDA

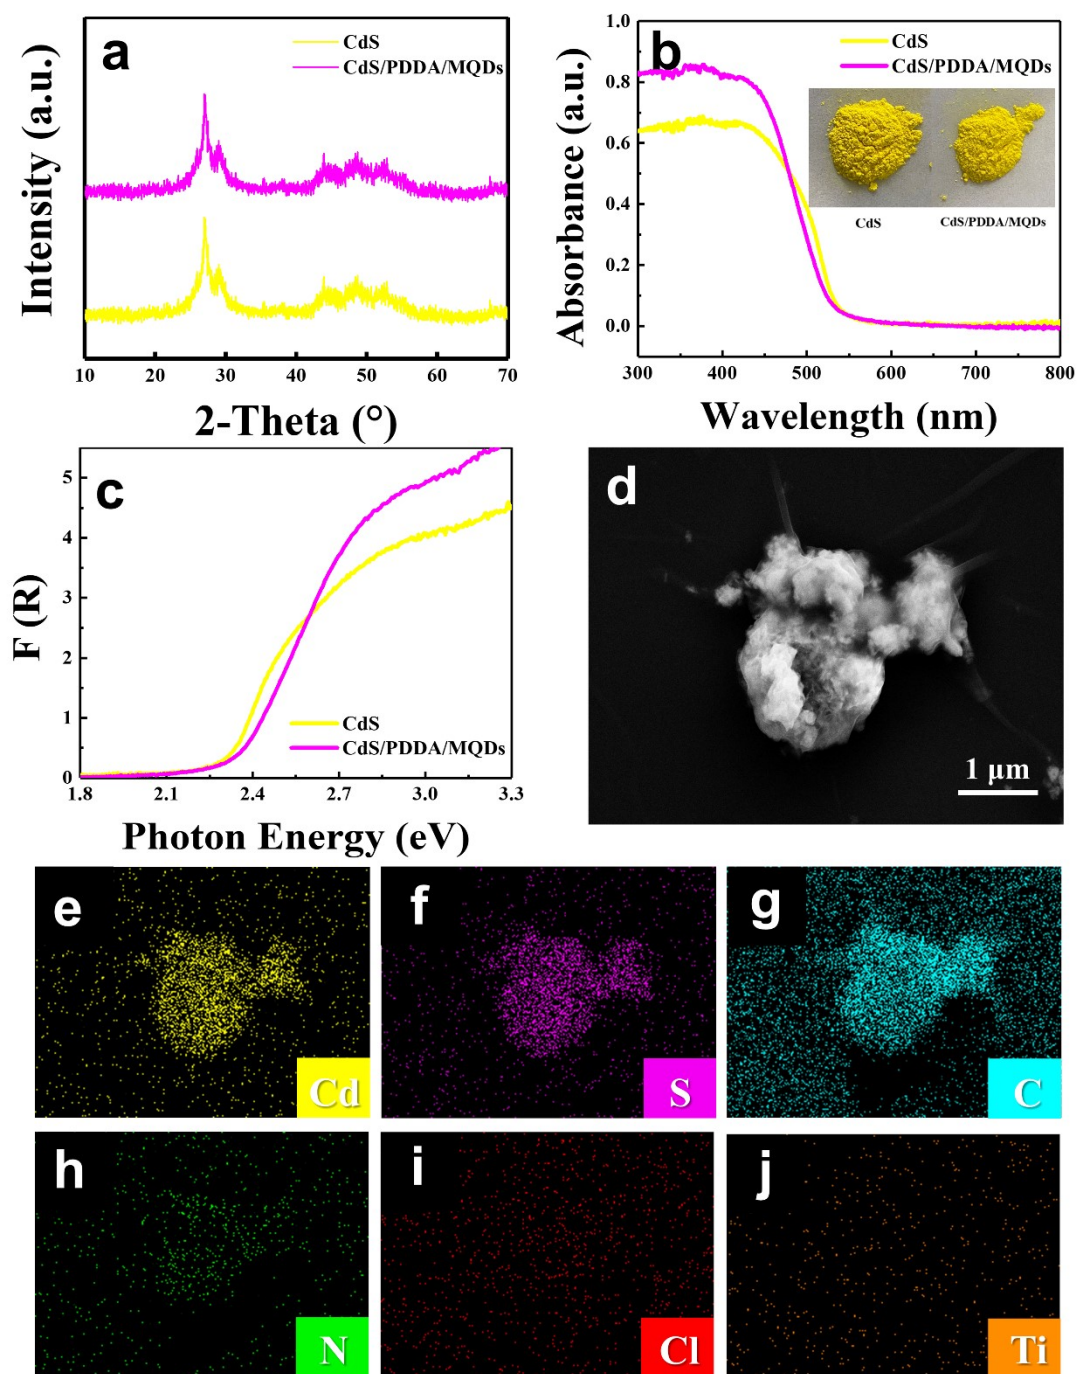

**Fig. S30.** (a) XRD patterns of blank CdS and CdS/PDDA/MQDs; (b) DRS spectra of CdS and CdS/PDDA/MQDs with (c) transformed plots calculated based on the Kubelka–Munk function vs. the energy of light; (d) FESEM image and (e-h) elemental mapping result of CdS/PDDA/MQDs,

**Note:** XRD pattern of CdS/PDDA/MQDs (**Fig. S30a**) shows the hexagonal phase CdS (JCPDS No. 77-2306) <sup>S2</sup>, similar to that of pure CdS. As displayed in **Fig. S30(b & c)**, CdS and CdS/PDDA/MQDs exhibit the similar absorption edge, indicating both PDDA and MQDs deposition does not influence the optical property of CdS NSs. Elemental mapping result of ZIS/APTES/MQDs in **Fig. S30(e-j)** of Cd, S, C, N, Cl and Ti signals.

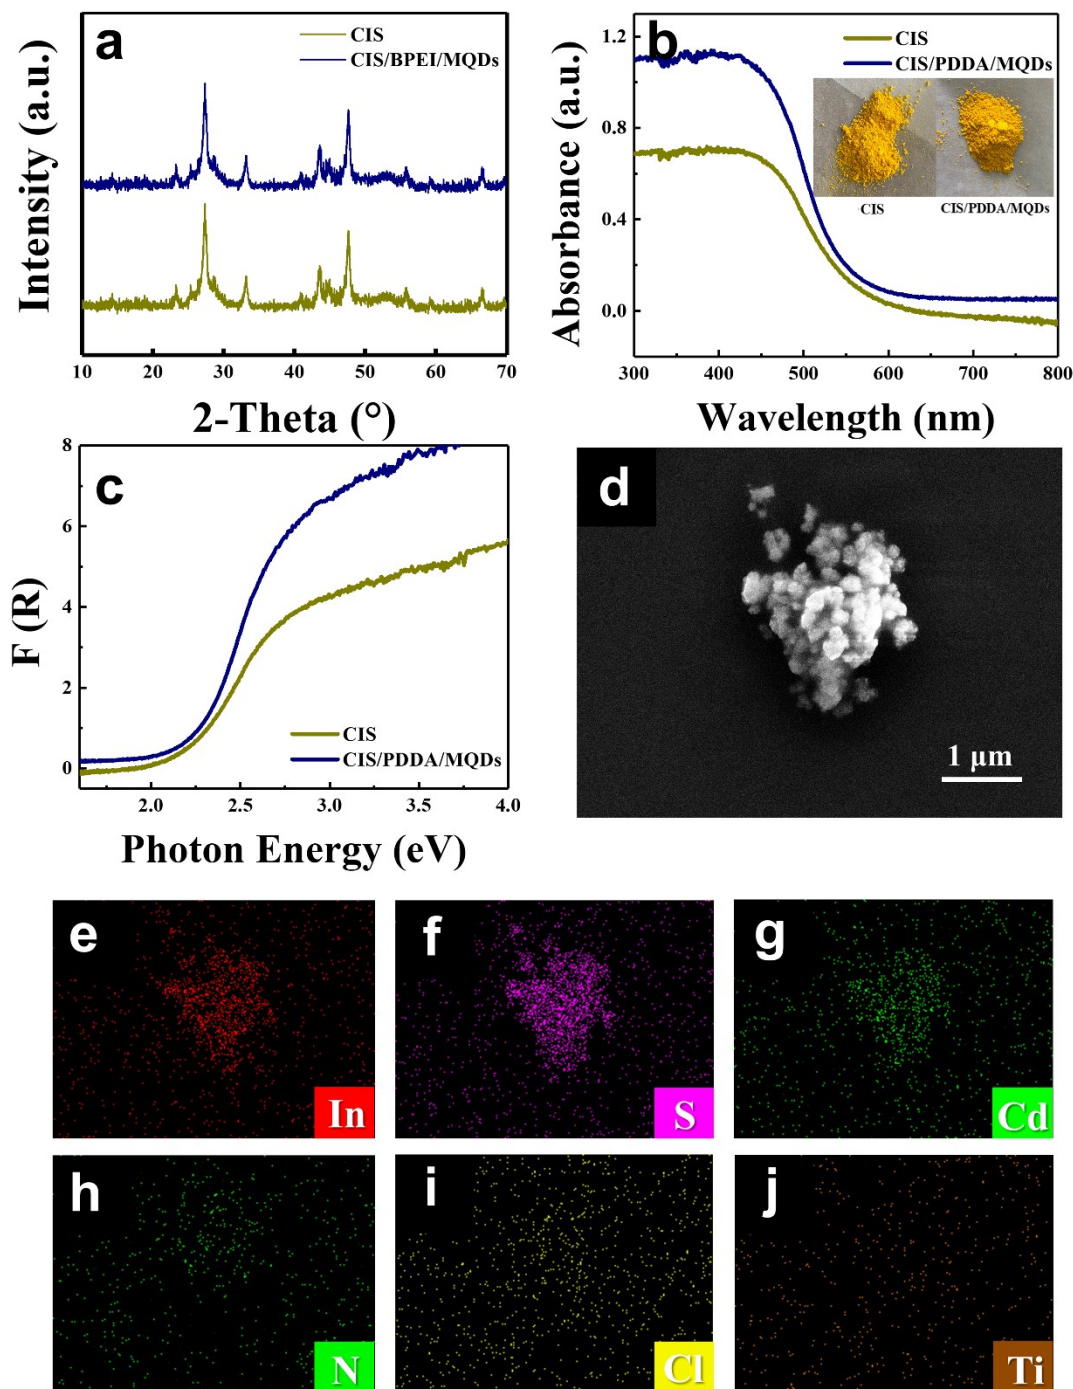

**Fig. S31.** (a) XRD patterns of blank CIS and CIS/PDDA/MQDs; (b) DRS spectra of CIS and CIS/PDDA/MQDs with (c) transformed plots calculated based on the Kubelka–Munk function vs. the energy of light; (d) FESEM image and (e-j) elemental mapping result of CIS/PDDA/MQDs, .

**Note:** XRD pattern of CIS/PDDA/MQDs (**Fig. S31a**) shows the cubic phase CIS (JCPDS No. 27-0060)<sup>S3</sup>, similar to pure CIS. As displayed in **Fig. S31(b & c)**, CIS and CIS/PDDA/MQDs exhibit the similar absorption edge, indicating both PDDA and MQDs deposition does not influence the optical property of CIS NSs. Elemental mapping result of CIS/PDDA/MQDs in **Fig. S31(e-j)** demonstrates the uniform distribution patterns of Cd, In, S, N, Cl and Ti signals.

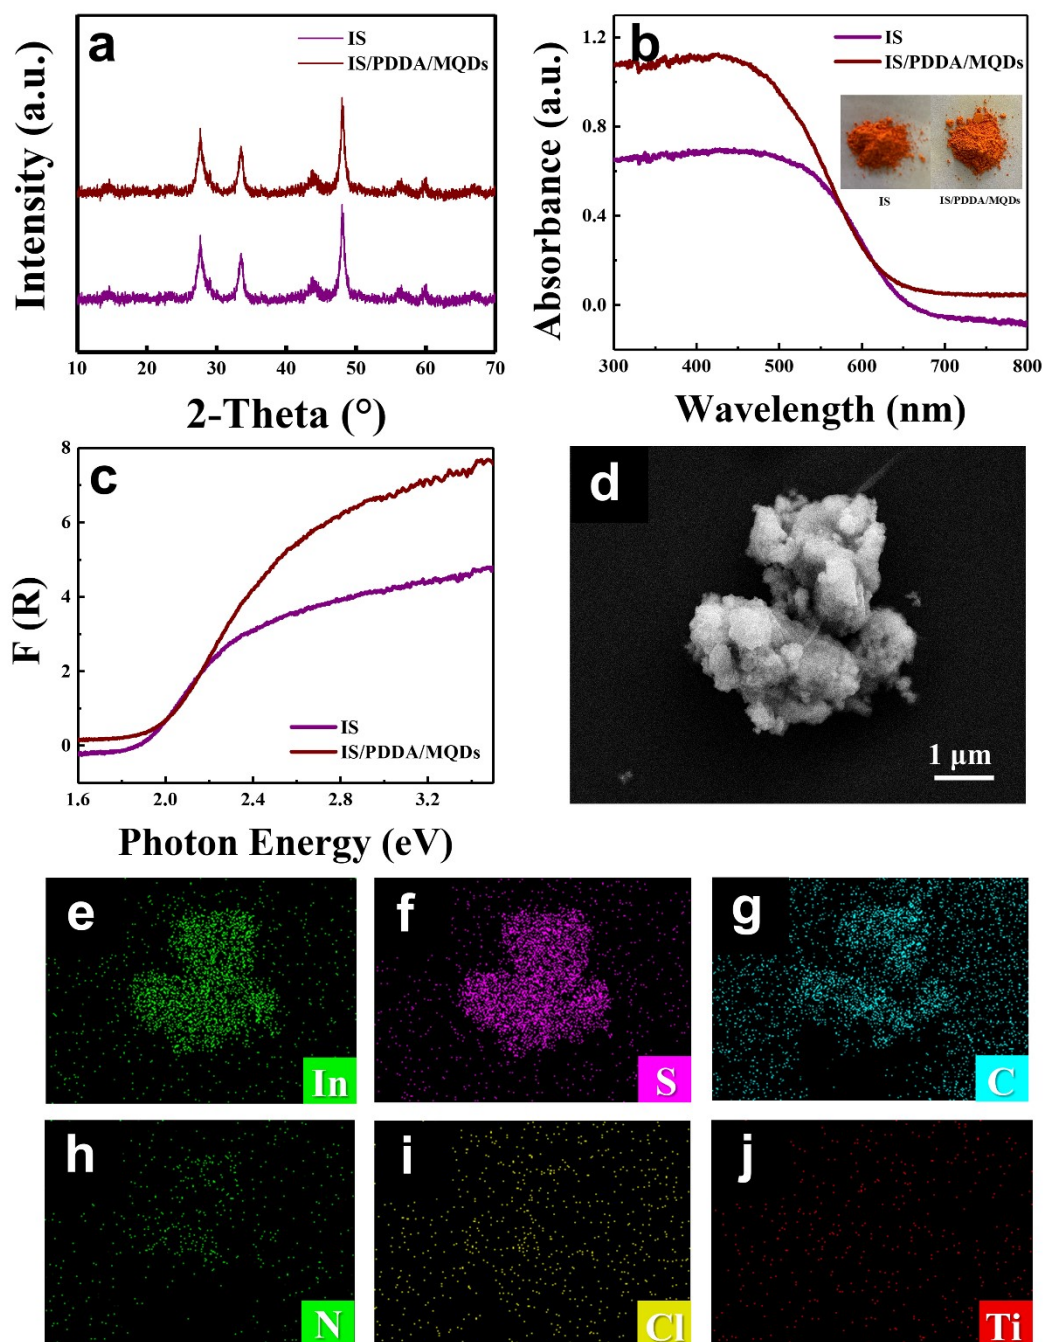

**Fig. S32.** (a) XRD patterns of blank IS and IS/PDDA/MQDs heterostructure; (b) DRS spectra of IS and IS/PDDA/MQDs heterostructure with (c) transformed plots calculated based on the Kubelka–Munk function vs. the energy of light; (d) FESEM image and (e-j) elemental mapping results of IS/PDDA/MQDs.

**Note:** XRD pattern of IS/PDDA/MQDs (**Fig. S32a**) shows the cubic phase IS ((JCPDS No. 65-0459)<sup>S3</sup>, similar to pure IS. As displayed in **Fig. S32(b & c)**, IS and IS/PDDA/MQDs exhibit the similar absorption edge, indicating both PDDA and MQDs deposition does not influence the optical property of IS NSs. Elemental mapping result of IS/PDDA/MQDs in **Fig. S32(e-j)** demonstrates the uniform distribution patterns of In, S, C, N, Cl and Ti signals.

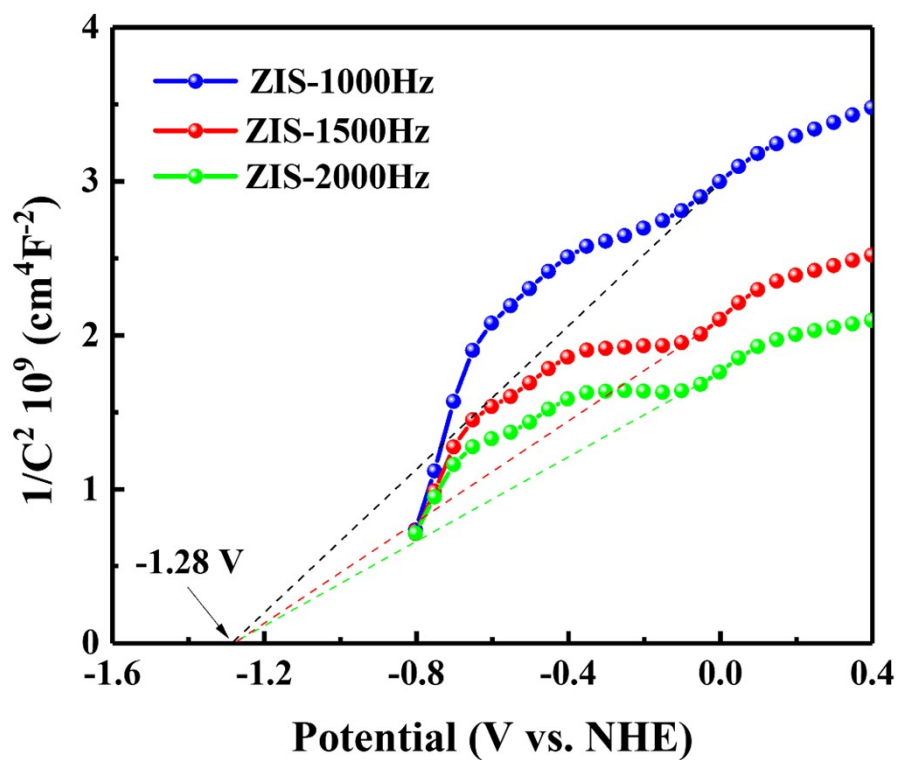

Fig. S33. Mott-Schottky plots of ZIS NSs probed under different frequencies.

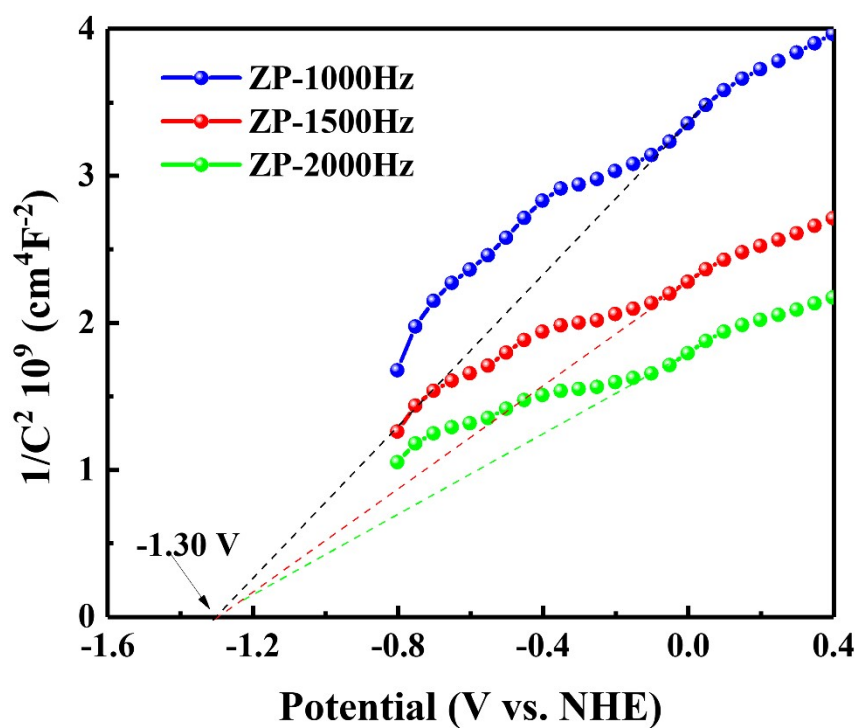

Fig. S34. Mott-Schottky plots of ZP NSs probed under different frequencies.

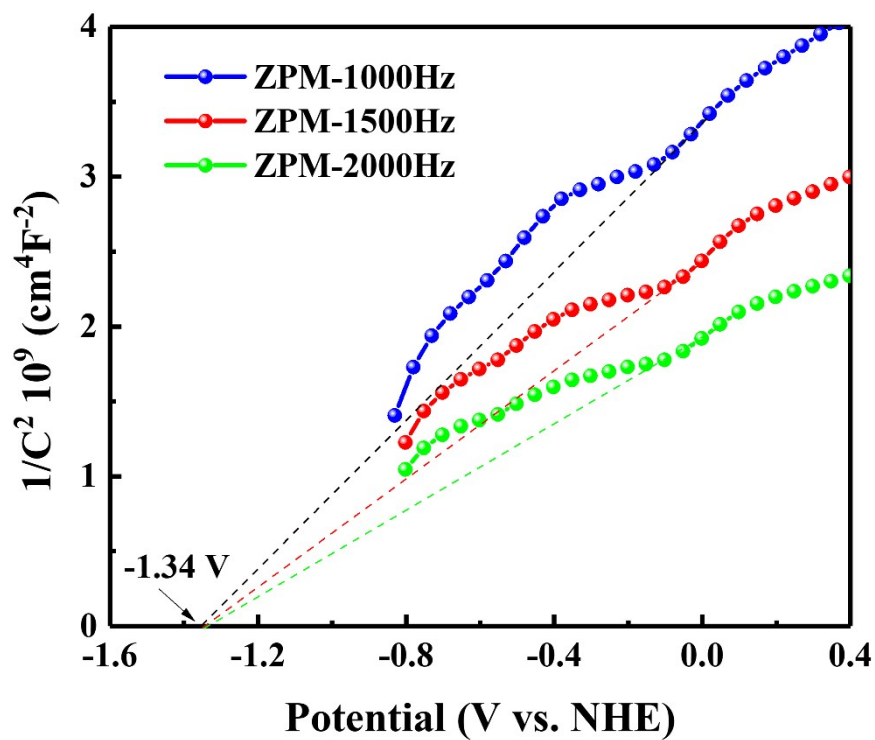

**Fig. S35.** Mott-Schottky plots of ZP NSs probed under different frequencies.

**Note:** Flat band position ( $V_{fb}$ ) can be determined by Mott-Schottky plots probed under different frequencies. Apparently, intersection point does not depend on the frequency, and  $V_{fb}$  potentials of ZIS, ZP and ZPM are approximately determined as -1.28 V, -1.30 V, and -1.34 V vs. NHE.

**Table S1.** Functional groups vs. wavenumber for different samples.

| Wavenumber (cm <sup>-1</sup> ) | Vibration mode        | Functional groups or Chemical bonds |
|--------------------------------|-----------------------|-------------------------------------|
| 3430                           | $\nu_{\text{O-H}}$    | N-H                                 |
| 2850 & 2923                    | $\nu_{\text{C-H}}$    | -CH <sub>2</sub> -                  |
| 1620                           | $\nu_{\text{O-H}}$    | C=O                                 |
| 1380                           | $\delta_{\text{C-H}}$ | -CH <sub>3</sub>                    |
| 617                            | Ti-C                  | Ti <sub>3</sub> C <sub>2</sub>      |

**Table S2.** Specific surface area, pore volume and pore size of ZIS NSs, ZP, and ZPM.

| Samples | $S_{\text{BET}}$ (m <sup>2</sup> /g) <sup>a</sup> | Total pore volume (cm <sup>3</sup> /g) <sup>b</sup> | Average pore size (nm) <sup>c</sup> |
|---------|---------------------------------------------------|-----------------------------------------------------|-------------------------------------|
| ZIS     | 51.7358                                           | 0.052424                                            | 23.110                              |
| ZP      | 23.0015                                           | 0.045723                                            | 24.433                              |
| ZPM     | 29.7899                                           | 0.043045                                            | 28.899                              |

**Table S3.** Chemical bond species vs. B.E. for different samples.

| Element              | ZIS NSs      | ZPM        | Chemical Bond Species        |
|----------------------|--------------|------------|------------------------------|
| Zn 2p <sub>3/2</sub> | 1022.18 eV   | 1022.07 eV | Zn <sup>2+</sup>             |
| Zn 2p <sub>1/2</sub> | 1045.18 eV   | 1045.27 eV | Zn <sup>2+</sup>             |
| In 3d <sub>5/2</sub> | 445.14 eV    | 445.35 eV  | In <sup>3+</sup>             |
| In 3d <sub>3/2</sub> | 452.68 eV    | 452.46 eV  | In <sup>3+</sup>             |
| S 2p <sub>3/2</sub>  | 161.83 eV    | 161.96 eV  | S <sup>2-</sup>              |
| S 2p <sub>1/2</sub>  | 163.13 eV    | 163.17 eV  | S <sup>2-</sup>              |
| C 1s                 | 284.80 eV    | 248.80 eV  | C-C <sup>-</sup>             |
| C 1s                 | 286.50 eV    | 286.66 eV  | C-N                          |
| C 1s                 | 288.46 eV    | 288.31 eV  | C=O                          |
| N 1s                 | 400.13 eV    | 400.14 eV  | Primary amine                |
| N 1s                 | Not detected | 402.59 eV  | NH <sub>4</sub> <sup>+</sup> |
| Ti 2p                | Not detected | 461.88 eV  | Ti-C                         |

**Table S4.** Photoactivities of different samples toward reduction of a series of nitroaromatic compounds under visible light irradiation ( $\lambda > 420$  nm).

| Number | Substrate                                                                           | Conversion (%) |       |       |       |
|--------|-------------------------------------------------------------------------------------|----------------|-------|-------|-------|
|        |                                                                                     | ZIS NSs        | ZP    | ZPM   | ZM    |
| a      | 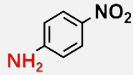   | 23.05          | 41.38 | 93.64 | 41.30 |
| b      | 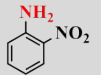   | 9.65           | 27.11 | 54.83 | 32.22 |
| c      | 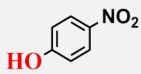   | 16.98          | 30.06 | 62.14 | 36.70 |
| d      | 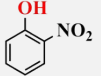   | 20.61          | 47.48 | 67.14 | 30.34 |
| f      | 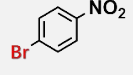   | 26.53          | 54.74 | 72.59 | 58.61 |
| g      | 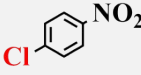   | 25.27          | 55.66 | 73.01 | 47.61 |
| h      | 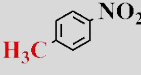  | 32.31          | 42.17 | 61.39 | 37.5  |
| i      | 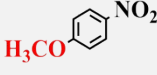 | 30.66          | 51.54 | 76.33 | 53.11 |
| j      | 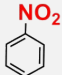 | 19.85          | 35.64 | 55.30 | 36.58 |

**Table S5.** Photoactivities of different samples toward 4-NA photoreduction under visible light irradiation ( $\lambda > 420$  nm).

| Number | Sample        | Irradiation time (min) | Conversion (%) |
|--------|---------------|------------------------|----------------|
| 1      | ZIS           | 25                     | 23.05          |
| 2      | ZIS/BPEI      | 25                     | 76.67          |
| 3      | ZIS/BPEI/MQDs | 25                     | 97.73          |
| 4      | ZIS/PAH       | 25                     | 58.24          |
| 5      | ZIS/PAH/MQDs  | 25                     | 89.68          |
| 6      | ZIS/AET       | 25                     | 64.40          |
| 7      | ZIS/AET/MQDs  | 25                     | 91.33          |
| 8      | CdS           | 5                      | 42.99          |
| 9      | CdS/PDDA      | 5                      | 86             |
| 10     | CdS/PDDA/MQDs | 5                      | 89.88          |
| 11     | CIS           | 10                     | 41.44          |
| 12     | CIS/PDDA      | 10                     | 60.24          |
| 12     | CIS/PDDA/MQDs | 10                     | 80.12          |
| 13     | IS            | 10                     | 32.14          |
| 14     | IS/PDDA       | 10                     | 38.17          |
| 15     | IS/PDDA/MQDs  | 10                     | 59.56          |

**Table S6.** Fitted EIS results of different samples based on the equivalent circuit

| Sample | $R_s$ / ohm | $R_{ct}$ / ohm | $CPE/(F \cdot cm^{-2})$ |
|--------|-------------|----------------|-------------------------|
| ZIS    | 17.81       | 9187           | 0.0001210               |
| ZP     | 16.4        | 7365           | 0.0000872               |
| ZPM    | 15.99       | 5202           | 0.0000569               |

## References

- S1. Yang, M. -Q.; Xu, Y. J.; Lu, W. H.; Zeng, K. Y.; Zhu, H.; Xu, Q. H.; Ho, G. W. Self-surface charge exfoliation and electrostatically coordinated 2D hetero-layered hybrids. *Nat. Commun.* 2017, 8, 14224.
- S2. Xie, X. Q.; Zhang, N.; Tang, Z. R.; Anpo, M.; Xu, Y.- J.  $\text{Ti}_3\text{C}_2\text{T}_x$  MXene as a Janus cocatalyst for concurrent promoted photoactivity and inhibited photocorrosion. *Appl. Catal., B* 2018, 237, 43-49.
- S3. Mo, Q. L.; Lin, X.; Wei, Z. Q.; Dai, X. C.; Hou, S.; Li, T.; Xiao, F. -X. All-in-one: branched macromolecule-protected metal nanocrystals as integrated charge separation/motion centers for enhanced photocatalytic selective organic transformations. *J. Mater. Chem. A* 2020, 8, 16392-16404.
- S4. Xue, Q.; Zhang, H. J.; Zhu, M. S.; Pei, Z. X.; Li, H. F.; Wang, Z. F.; Huang, Y.; Huang, Y.; Deng, Q. H.; Zhou, J.; Du, S. Y.; Huang, Q.; Zhi, C. Y. Photoluminescent  $\text{Ti}_3\text{C}_2$  MXene Quantum Dots for Multicolor Cellular Imaging. *Adv. Mater.* **2017**, 29, 1604847.
